# Supplementary material for: TiO2 (P25) nanoparticle catalyzed C-alkylation and quinoline synthesis via the borrowing hydrogen method
Source: Royal Society of Chemistry journal article supplement (doi:10.1039/d3nj00460k), 2023-01-01

## Supporting information

### **TiO<sub>2</sub> (P25) nanoparticles catalyzed C-alkylation and quinoline synthesis via borrowing hydrogen method<sup>† ‡</sup>**

**Krishnan Kala<sup>a</sup>, Sanjeev Gupta<sup>b</sup>, Venugopal T. Bhat<sup>a</sup>, (the late) Manickam Sasidharan<sup>a‡</sup>, Parasuraman Selvam<sup>b,c</sup>, Thanikachallam Pushpa Malini<sup>a\*</sup>**

<sup>a</sup> *SRM Research Institute and Department of Chemistry, SRM Institute of Science and Technology, Kattankulathur, Chennai, 603 203, India*

<sup>b</sup> *National Centre for Catalysis Research and Department of Chemistry, Indian Institute of Technology-Madras, Chennai 600 036, India*

<sup>c</sup> *International Research Organization for Advanced Science and Technology, Kumamoto University, 2-39-1 Kurokami, Kumamoto 860-8555, Japan*

**Keywords:** C- alkylation, TiO<sub>2</sub>, borrowing hydrogen; hydrogen auto-transfer; quinoline.

---

\* Corresponding author's E-mail: T.P. Malini < [pushpamt@srmist.edu.in](mailto:pushpamt@srmist.edu.in) >

<sup>†</sup> Supporting information is available for this paper

<sup>‡</sup> This paper honors the memory of our wonderful co-author, Professor M. Sasidharan, who died prematurely due to COVID-19.

---

## TABLE OF CONTENTS

---

|   |                                                |     |
|---|------------------------------------------------|-----|
| 1 | General information                            | S2  |
| 2 | Catalyst Characterization                      | S3  |
| 3 | Catalyst Recyclability                         | S4  |
| 3 | Characterization data                          | S6  |
| 4 | References                                     | S12 |
| 4 | <sup>1</sup> H and <sup>13</sup> C NMR Spectra | S13 |

---

### General information

The catalytic reaction's chemical components were all sourced from commercial suppliers. This was not subjected to any additional purification prior to use. Titanium dioxide (TiO<sub>2</sub>, P25) nanoparticles (21 nm size) with 99.9% purity were purchased from Sigma-Aldrich. Benzyl alcohols, acetones, and their substituted compounds were obtained from various chemical sources, like Sigma-Aldrich, Tokyo Kasei Industries (TCI), and Avra Chemicals. Solvents (hexane, petroleum ether, and ethyl acetate) were received from Avra Chemicals. The solvents were dried using a standard procedure. C-alkylation and quinoline synthesis reactions were achieved in an Ar atmosphere. a 15-mL reaction tube made with quartz submerged in an oil bath (silicone oil), coupled with an inbuilt thermocouple that tracks temperature and a magnetic stirrer sensor to regulate stirring speed. A Bruker BBFO (500 MHz and 400 MHz) spectrometer was used to record <sup>1</sup>H and <sup>13</sup>C NMR signals. Spin-spin coupling constant (J) is mentioned in Hz, chemical shift (δ) is mentioned in ppm, and an internal standard (TMS) and solvent (CDCl<sub>3</sub>) are employed in the spectrometer. An Agilent 7890-B with a 30-meter capillary column (OV-101) and equipped with a flame ionization detector (FID) was used for GC analysis, and Dodecane (30 μL) served as the external standard for the GC's product analysis.

## Catalyst Characterization

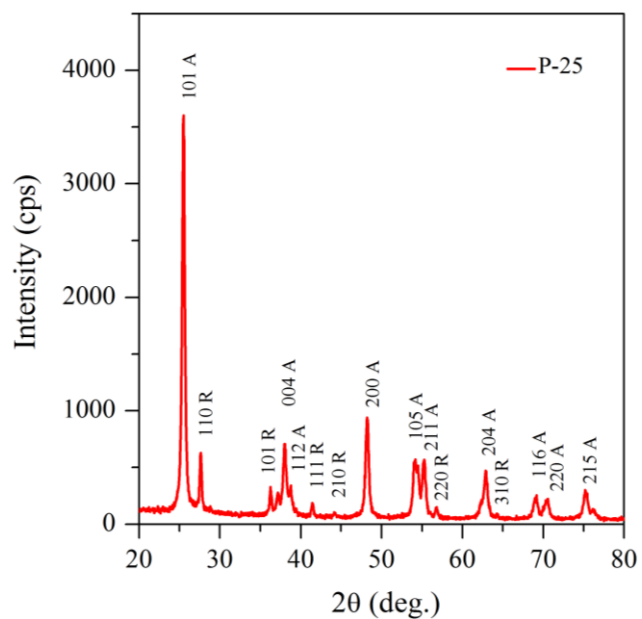

**Figure. S1.** XRD pattern of the commercial TiO<sub>2</sub>.

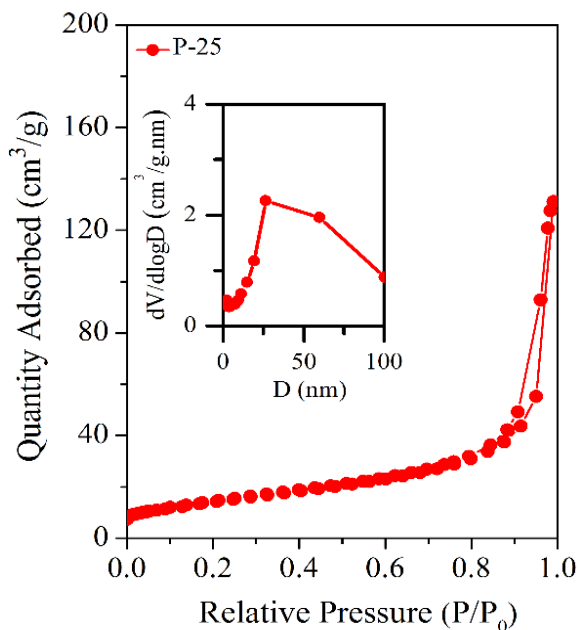

**Figure. S2.** BET isotherms and BJH pore-size distribution (inset) of TiO<sub>2</sub> catalyst.

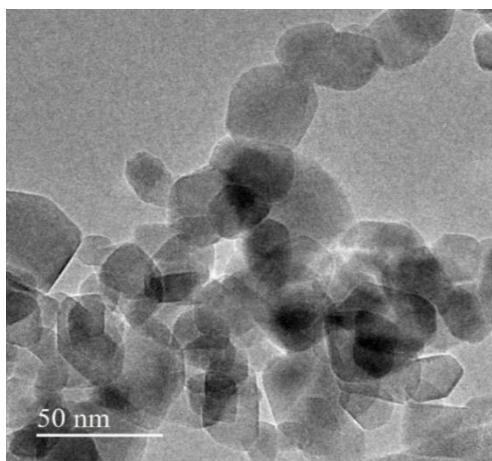

**Figure. S3.** TEM image of TiO<sub>2</sub> (P25) catalyst.

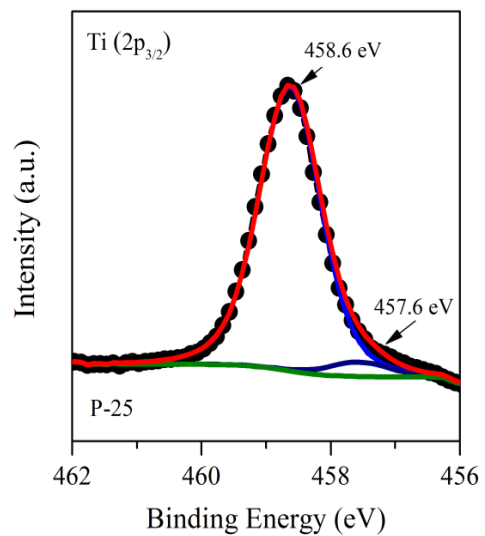

**Figure.S4.** Core-level XP spectra of TiO<sub>2</sub> (P25).

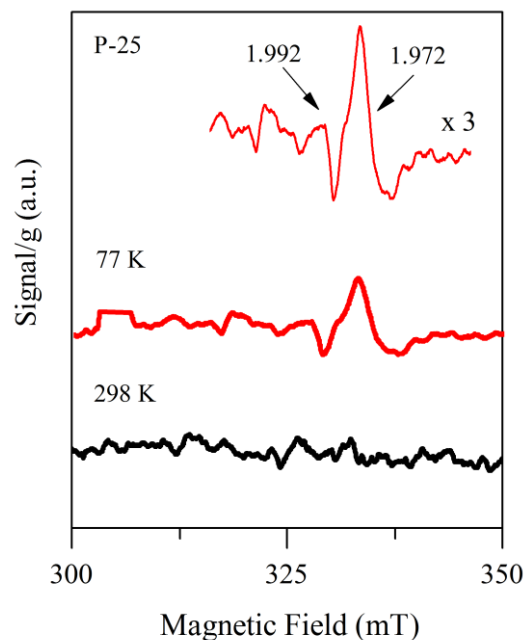

**Figure. S5.** EPR spectra of TiO<sub>2</sub> (P25).

### **Catalyst recyclability**

The TiO<sub>2</sub> recovered in the first reaction run was properly washed using ethanol and milli-Q water to remove the organic products or solvent molecules clogging the catalyst's surface. It was vacuum dried at 120 °C for 2 h. Following that, the catalytic reactions were furnished with standard reaction conditions. After the reaction was completed, the reaction tube was cooled to room temperature, and the TiO<sub>2</sub> was centrifuged and washed properly with milli-Q water and ethanol. The recovered catalyst was vacuum dried in a vacuum oven at 120 °C for 2 hours. This complete process must be repeated each time before the next reaction run begins. This cycle of reaction was repeated six times. Silica gel column chromatography (hexane-ethyl acetate solvent method) is used to obtain the yield of pure products.

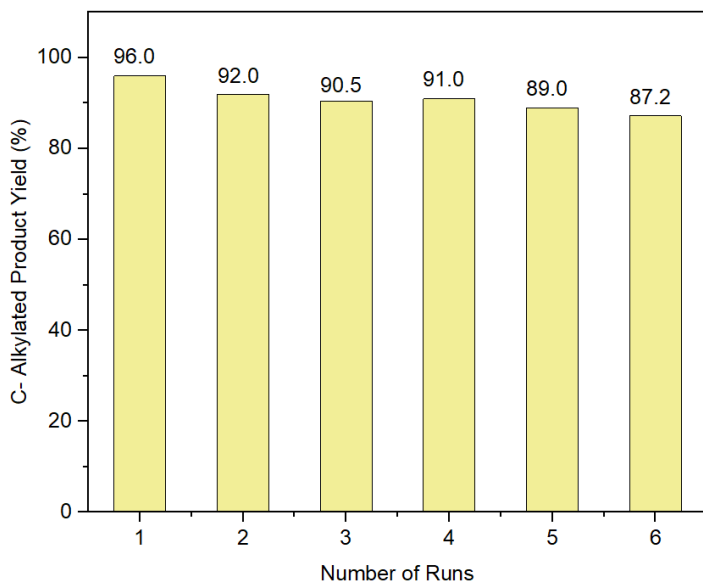

**Figure. S6.** Recyclability test of TiO<sub>2</sub> catalyst to C-Alkylation reaction.

## <sup>1</sup>H and <sup>13</sup>C NMR data

|                                                                                     |                                                                                                                                                                                                                                                                                                                                                                                                                                                                                                                                                                                                                                      |
|-------------------------------------------------------------------------------------|--------------------------------------------------------------------------------------------------------------------------------------------------------------------------------------------------------------------------------------------------------------------------------------------------------------------------------------------------------------------------------------------------------------------------------------------------------------------------------------------------------------------------------------------------------------------------------------------------------------------------------------|
| 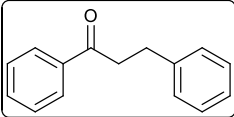   | <p><b>1,3-diphenylpropan-1-one (3aa)<sup>1</sup></b> prepared by standard procedure with a yield of 96%, Colorless oil.</p> <p><b><sup>1</sup>H NMR</b> (500 MHz, CDCl<sub>3</sub>, 25°C, TMS) δ 7.8(d, <i>J</i> = 7.9 Hz, 1H), 7.38 (t, <i>J</i> = 7.3 Hz, 1H), 7.28 (t, <i>J</i> = 7.6 Hz, 1H), 7.19 – 7.08 (m, 3H), 7.06 (t, <i>J</i> = 7.0 Hz, 1H), 3.13 (t, <i>J</i> = 7.7 Hz, 2H), 2.92 (t, <i>J</i> = 7.7 Hz, 2H).</p> <p><b><sup>13</sup>C NMR</b> (126 MHz, CDCl<sub>3</sub>) δ 199.24, 141.40, 136.90, 133.17, 128.70, 128.64, 128.55, 128.13, 126.24, 40.51, 30.19.</p>                                                   |
|    | <p><b>1-phenyl-3-(m-tolyl)propan-1-one (3ba)<sup>2</sup></b> prepared by standard procedure with a yield of 97%, white solid.</p> <p><b><sup>1</sup>H NMR</b> (500 MHz, CDCl<sub>3</sub>, 25°C, TMS) δ 7.95 (dd, <i>J</i> = 8.3, 1.1 Hz, 2H), 7.54 (t, <i>J</i> = 7.4 Hz, 1H), 7.44 (t, <i>J</i> = 7.7 Hz, 2H), 7.18 (t, <i>J</i> = 7.5 Hz, 1H), 7.09 – 6.95 (m, 3H), 3.33 – 3.22 (m, 2H), 3.08 – 2.92 (m, 2H), 2.32 (s, 3H).</p> <p><b><sup>13</sup>C NMR</b> (126 MHz, CDCl<sub>3</sub>) δ 199.37, 141.24, 138.15, 136.83, 133.09, 129.26, 128.62, 128.46, 128.07, 126.90, 125.41, 40.58, 30.07, 21.43.</p>                        |
|  | <p><b>3-(4-methoxyphenyl)-1-phenylpropan-1-one (3ca)<sup>2</sup></b> prepared by standard procedure with a yield of 89%, Yellow solid.</p> <p><b><sup>1</sup>H NMR</b> (500 MHz, CDCl<sub>3</sub>, 25°C, TMS) δ 7.99 (d, <i>J</i> = 7.8 Hz, 2H), 7.58 (t, <i>J</i> = 7.3 Hz, 1H), 7.48 (t, <i>J</i> = 7.7 Hz, 2H), 7.21 (d, <i>J</i> = 8.3 Hz, 2H), 6.88 (d, <i>J</i> = 8.4 Hz, 2H), 3.82 (s, 3H), 3.30 (t, <i>J</i> = 7.7 Hz, 2H), 3.05 (t, <i>J</i> = 7.6 Hz, 2H).</p> <p><b><sup>13</sup>C NMR</b> (126 MHz, CDCl<sub>3</sub>) δ 199.43, 158.01, 136.90, 133.34, 133.09, 129.41, 128.64, 128.08, 113.96, 55.30, 40.75, 29.30.</p> |
|  | <p><b>1-(4-ethoxyphenyl)-3-phenylpropan-1-one (3ab)<sup>2</sup></b> prepared by standard procedure with a yield of 81%, Yellow solid.</p> <p><b><sup>1</sup>H NMR</b> (500 MHz, CDCl<sub>3</sub>, 25°C, TMS) δ 7.89 – 7.80 (m, 2H), 7.24 – 7.19 (m, 2H), 7.17 (dd, <i>J</i> = 6.3, 1.8 Hz, 2H), 7.12 (t, <i>J</i> = 7.1 Hz, 1H), 6.86 – 6.77</p>                                                                                                                                                                                                                                                                                     |

|                                                                                     |                                                                                                                                                                                                                                                                                                                                                                                                                                                                                                                                                                                                                                                                                                                                                                                 |
|-------------------------------------------------------------------------------------|---------------------------------------------------------------------------------------------------------------------------------------------------------------------------------------------------------------------------------------------------------------------------------------------------------------------------------------------------------------------------------------------------------------------------------------------------------------------------------------------------------------------------------------------------------------------------------------------------------------------------------------------------------------------------------------------------------------------------------------------------------------------------------|
|                                                                                     | <p>(m, 2H), 4.00 (m, <math>J = 7.0</math> Hz, 2H), 3.24 – 3.09 (m, 2H), 3.05 – 2.89 (m, 2H), 1.35 (t, <math>J = 7.0</math> Hz, 3H).</p> <p><math>^{13}\text{C NMR}</math> (126 MHz, <math>\text{CDCl}_3</math>) <math>\delta</math> 197.88, 162.91, 141.52, 130.35, 129.77, 128.54, 128.47, 126.11, 114.17, 63.77, 40.14, 30.36, 14.72.</p>                                                                                                                                                                                                                                                                                                                                                                                                                                     |
| 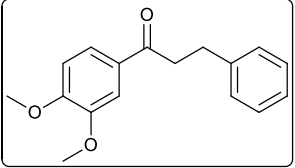   | <p><b>1-(3,4-dimethoxyphenyl)-3-phenylpropan-1-one (3ac)</b> prepared by standard procedure with a yield of 97%, Yellow solid. <math>^1\text{H NMR}</math> (500 MHz, <math>\text{CDCl}_3</math>, 25°C, TMS) <math>\delta</math> 7.60 (dd, <math>J = 8.4, 2.0</math> Hz, 1H), 7.55 (d, <math>J = 2.0</math> Hz, 1H), 7.39 – 7.37 (m, 1H), 7.32 (dd, <math>J = 17.0, 9.8</math> Hz, 3H), 7.23 (t, <math>J = 7.2</math> Hz, 1H), 6.89 (d, <math>J = 8.4</math> Hz, 1H), 3.95 (d, <math>J = 6.3</math> Hz, 6H), 3.32 – 3.24 (m, 2H), 3.12 – 3.04 (m, 2H).</p> <p><math>^{13}\text{C NMR}</math> (126 MHz, <math>\text{CDCl}_3</math>) <math>\delta</math> 197.96, 153.24, 149.01, 141.46, 130.09, 128.56, 128.48, 127.58, 126.97, 126.15, 122.70, 110.11, 56.07, 40.03, 30.46.</p>  |
|   | <p><b>1-(2,5-dimethoxyphenyl)-3-phenylpropan-1-one (3ad)</b> prepared by standard procedure with a 72% yielding yellow solid. <math>^1\text{H NMR}</math> (500 MHz, <math>\text{CDCl}_3</math>, 25°C, TMS) <math>\delta</math> 7.29 (t, <math>J = 7.2</math> Hz, 2H), 7.24 (d, <math>J = 8.0</math> Hz, 3H), 7.19 (t, <math>J = 7.1</math> Hz, 1H), 7.02 (d, <math>J = 9.0</math> Hz, 1H), 6.90 (t, <math>J = 7.5</math> Hz, 1H), 3.83 (t, <math>J = 21.4</math> Hz, 6H), 3.31 (t, <math>J = 7.7</math> Hz, 2H), 3.02 (t, <math>J = 7.7</math> Hz, 2H).</p> <p><math>^{13}\text{C NMR}</math> (126 MHz, <math>\text{CDCl}_3</math>) <math>\delta</math> 201.30, 153.45, 153.13, 141.73, 128.49, 128.42, 128.34, 125.93, 120.08, 113.94, 113.07, 56.04, 55.84, 45.46, 30.52.</p> |
|  | <p><b>3-phenyl-1-(p-tolyl)propan-1-one (3ae)</b><sup>2</sup> prepared by standard procedure with a yield of 88%, Yellow oil. <math>^1\text{H NMR}</math> (500 MHz, <math>\text{CDCl}_3</math>, 25°C, TMS) <math>\delta</math> 7.93 (d, <math>J = 7.5</math> Hz, 2H), 7.44 – 7.20 (m, 7H), 3.33 (t, <math>J = 7.4</math> Hz, 2H), 3.22 – 3.07 (m, 2H), 2.46 (s, 3H).</p> <p><math>^{13}\text{C NMR}</math> (126 MHz, <math>\text{CDCl}_3</math>) <math>\delta</math> 198.90, 143.89, 141.49, 134.45, 129.37, 128.60, 128.52, 128.25, 126.19, 40.39, 30.27, 21.71.</p>                                                                                                                                                                                                            |

|                                                                                     |                                                                                                                                                                                                                                                                                                                                                                                                                                                                                                                                                                                                                                                                    |
|-------------------------------------------------------------------------------------|--------------------------------------------------------------------------------------------------------------------------------------------------------------------------------------------------------------------------------------------------------------------------------------------------------------------------------------------------------------------------------------------------------------------------------------------------------------------------------------------------------------------------------------------------------------------------------------------------------------------------------------------------------------------|
| 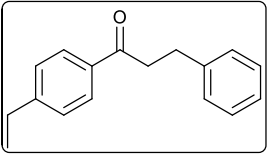   | <p><b>1-(4-ethylphenyl)-3-phenylpropan-1-one (3af)<sup>2</sup></b><br/> prepared by standard procedure with a yield of 76%, Yellow oil. <sup>1</sup>H NMR (500 MHz, CDCl<sub>3</sub>, 25°C, TMS) δ 7.81 (d, <i>J</i> = 8.3 Hz, 2H), 7.27 – 7.16 (m, 6H), 7.13 (t, <i>J</i> = 7.2 Hz, 1H), 3.24 – 3.15 (m, 2H), 3.03 – 2.94 (m, 2H), 2.62 (m, <i>J</i> = 7.6 Hz, 2H), 1.18 (t, <i>J</i> = 7.6 Hz, 3H).</p> <p><sup>13</sup>C NMR (126 MHz, CDCl<sub>3</sub>) δ 198.98, 150.07, 141.44, 134.59, 128.54, 128.46, 128.31, 128.14, 126.13, 40.41, 30.23, 28.97, 15.26.</p>                                                                                              |
|    | <p><b>1-(4-isobutylphenyl)-3-phenylpropan-1-one (3ag)<sup>2</sup></b><br/> prepared by standard procedure with a yield of 83%, Yellow oil. <sup>1</sup>H NMR (500 MHz, CDCl<sub>3</sub>, 25°C, TMS) δ 7.80 (d, <i>J</i> = 8.2 Hz, 2H), 7.22 (dd, <i>J</i> = 10.1, 4.7 Hz, 2H), 7.19 – 7.15 (m, 2H), 7.13 (dd, <i>J</i> = 10.7, 7.7 Hz, 3H), 3.29 – 3.12 (m, 2H), 3.07 – 2.91 (m, 2H), 2.44 (d, <i>J</i> = 7.2 Hz, 2H), 1.81 (dt, <i>J</i> = 13.5, 6.8 Hz, 1H), 0.92 (s, 3H), 0.89 (s, 3H).</p> <p><sup>13</sup>C NMR (126 MHz, CDCl<sub>3</sub>) δ 199.01, 147.61, 141.45, 134.64, 129.36, 128.55, 128.48, 128.35, 128.07, 126.13, 45.40, 40.41, 30.16, 22.37.</p> |
|  | <p><b>1-(4-bromophenyl)-3-phenylpropan-1-one (3ah)<sup>1</sup></b><br/> prepared by standard procedure with a yield of 55%, Yellow oil. <sup>1</sup>H NMR (500 MHz, CDCl<sub>3</sub>, 25°C, TMS) δ 7.74 (d, <i>J</i> = 8.1 Hz, 2H), 7.52 (d, <i>J</i> = 8.1 Hz, 2H), 7.30 (d, <i>J</i> = 8.7 Hz, 1H), 7.22 (d, <i>J</i> = 7.0 Hz, 2H), 7.12 (dd, <i>J</i> = 35.6, 9.3 Hz, 2H), 3.19 (t, <i>J</i> = 7.2 Hz, 2H), 2.99 (t, <i>J</i> = 7.2 Hz, 2H).</p> <p><sup>13</sup>C NMR (126 MHz, CDCl<sub>3</sub>) δ 198.23, 141.05, 135.53, 131.94, 129.59, 128.60, 128.43, 128.27, 126.26, 40.45, 30.03.</p>                                                                 |
|  | <p><b>1-phenyl-3-(pyridin-4-yl)propan-1-one (3da)</b><br/> prepared by standard procedure with a yield of 85%, Brown solid. <sup>1</sup>H NMR: (500 MHz, CDCl<sub>3</sub>, 25°C, TMS) δ 8.49 (dd, <i>J</i> = 4.4 Hz, 1.8 Hz, 2H), 7.93-7.95 (m, 2H), 7.53-7.57 (m, 1H), 7.43-7.46 (m, 2H), 7.16-7.18 (m, 2H), 3.31 (t, <i>J</i> = 7.4 Hz, 2H), 3.05 (t, 7.5 Hz, 2H). <sup>13</sup>C NMR (126 MHz, CDCl<sub>3</sub>) δ 198.23, 150.42, 149.75,</p>                                                                                                                                                                                                                  |



|                                                                                     |                                                                                                                                                                                                                                                                                                                                                                                                                                                                                                                                                                                                                       |
|-------------------------------------------------------------------------------------|-----------------------------------------------------------------------------------------------------------------------------------------------------------------------------------------------------------------------------------------------------------------------------------------------------------------------------------------------------------------------------------------------------------------------------------------------------------------------------------------------------------------------------------------------------------------------------------------------------------------------|
|                                                                                     | 136.57, 133.35, 128.72, 128.00, 123.94, 77.28, 77.02, 76.77, 38.85, 29.18.                                                                                                                                                                                                                                                                                                                                                                                                                                                                                                                                            |
| 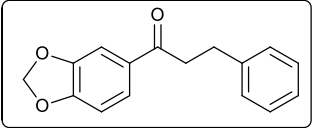   | <b>1-(benzo[d][1,3]dioxol-5-yl)-3-phenylpropan-1-one (3ea)</b> prepared by standard procedure with a yield of 70%, Yellow oil. <sup>1</sup> H NMR (500 MHz, CDCl <sub>3</sub> , 25 °C, TMS) δ 7.52 (d, J= 7.8Hz, 1H), 7.42 (s, 1H), 7.17-7.29 (m, 5H), 6.8 (d, J= 8.6Hz, 1H), 5.98 (s, 2H), 3.19 (t, J=7.5Hz, 2H), 3.03 (t, J=7.6Hz, 2H). <sup>13</sup> C NMR (126 MHz, CDCl <sub>3</sub> ) δ 197.32, 151.73, 148.20, 141.34, 131.77, 128.53, 128.43, 126.13, 124.26, 107.90, 107.87, 101.84, 40.23, 30.36.                                                                                                           |
|    | <b>2-phenylquinoline (6aa)</b> <sup>2</sup> prepared by standard procedure with a yield of 94%, White solid. <sup>1</sup> H NMR (500 MHz, CDCl <sub>3</sub> , 25°C, TMS) δ 8.13 – 8.04 (m, 4H), 7.77 (d, J = 8.6 Hz, 1H), 7.72 (d, J = 8.1 Hz, 1H), 7.63 (t, J = 7.6 Hz, 1H), 7.46 – 7.40 (m, 3H), 7.37 (t, J = 7.3 Hz, 1H).<br><br><sup>13</sup> C NMR (126 MHz, CDCl <sub>3</sub> ) δ 157.39, 148.33, 139.72, 136.83, 129.78, 129.72, 129.39, 128.91, 127.64, 127.53, 127.23, 126.34, 119.05.                                                                                                                       |
|  | <b>2-(4-ethylphenyl)quinoline (6ab)</b> <sup>2</sup> prepared by standard procedure with a yield of 84%, white solid. <sup>1</sup> H NMR (500 MHz, CDCl <sub>3</sub> , 25°C, TMS) δ 8.06 (d, J = 8.4 Hz, 1H), 7.99 (dd, J = 18.7, 8.1 Hz, 3H), 7.69 (d, J = 8.5 Hz, 1H), 7.64 (d, J = 8.0 Hz, 1H), 7.58 (t, J = 7.5 Hz, 1H), 7.36 (t, J = 7.4 Hz, 1H), 7.22 (d, J = 7.7 Hz, 2H), 2.60 (q, J = 7.5 Hz, 2H), 1.16 (t, J = 7.6 Hz, 3H).<br><br><sup>13</sup> C NMR (126 MHz, CDCl <sub>3</sub> ) δ 157.42, 148.36, 145.78, 137.20, 136.70, 129.72, 129.62, 128.45, 127.62, 127.51, 127.15, 126.12, 118.94, 28.79, 15.63. |
|  | <b>2-(2,5-dimethylphenyl)quinoline (6ac)</b> <sup>2</sup> prepared by standard procedure with a yield of 70%, Yellow oil. <sup>1</sup> H NMR (500 MHz, CDCl <sub>3</sub> , 25°C, TMS) δ 8.13 – 8.07 (m, 2H), 7.78 (d, J = 8.1 Hz, 1H), 7.66 (t, J = 8.3 Hz, 1H), 7.47 (dd, J = 15.9, 7.8 Hz, 2H), 7.17 (s, 1H), 7.13 (d, J = 7.8 Hz, 1H), 7.07 (d, J = 8.6 Hz, 1H), 2.30 (s, 3H), 2.28 (s, 3H).                                                                                                                                                                                                                       |

|                                                                                     |                                                                                                                                                                                                                                                                                                                                                                                                                                                                                                                                                                                                                                                                                                                                                                                                                                             |
|-------------------------------------------------------------------------------------|---------------------------------------------------------------------------------------------------------------------------------------------------------------------------------------------------------------------------------------------------------------------------------------------------------------------------------------------------------------------------------------------------------------------------------------------------------------------------------------------------------------------------------------------------------------------------------------------------------------------------------------------------------------------------------------------------------------------------------------------------------------------------------------------------------------------------------------------|
|                                                                                     | <p><b><math>^{13}\text{C}</math> NMR</b> (126 MHz, <math>\text{CDCl}_3</math>) <math>\delta</math> 160.46, 147.94, 140.56, 135.96, 135.49, 132.74, 130.80, 130.32, 129.61, 129.25, 129.27, 127.52, 126.75, 126.36, 122.47, 20.99, 19.86.</p>                                                                                                                                                                                                                                                                                                                                                                                                                                                                                                                                                                                                |
| 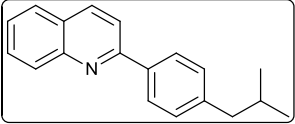   | <p><b>2-(4-isobutylphenyl)quinoline (6ad)</b><sup>3</sup> prepared by standard procedure with a yield of 67%, white solid. <b><math>^1\text{H}</math> NMR</b> (500 MHz, <math>\text{CDCl}_3</math>, 25°C, TMS) <math>\delta</math> 8.09 (t, <math>J</math> = 8.6 Hz, 2H), 7.99 (d, <math>J</math> = 7.7 Hz, 2H), 7.77 (d, <math>J</math> = 8.5 Hz, 1H), 7.72 (d, <math>J</math> = 8.0 Hz, 1H), 7.63 (t, <math>J</math> = 7.5 Hz, 1H), 7.42 (t, <math>J</math> = 7.3 Hz, 1H), 7.22 (d, <math>J</math> = 7.6 Hz, 2H), 2.47 (d, <math>J</math> = 7.1 Hz, 2H), 1.93 – 1.77 (m, 1H), 0.86 (s, 3H), 0.85 (s, 3H).</p> <p><b><math>^{13}\text{C}</math> NMR</b> (126 MHz, <math>\text{CDCl}_3</math>) <math>\delta</math> 157.51, 148.31, 143.25, 137.20, 136.71, 129.70, 129.68, 127.47, 127.37, 127.11, 126.11, 118.99, 45.26, 30.31, 22.42.</p> |
|    | <p><b>2-(4-methoxyphenyl)quinoline (6ae)</b><sup>3</sup> prepared by standard procedure with a yield of 93%, white solid. <b><math>^1\text{H}</math> NMR</b> (500 MHz, <math>\text{CDCl}_3</math>, 25°C, TMS) <math>\delta</math> 8.06 (t, <math>J</math> = 8.7 Hz, 4H), 7.71 (dd, <math>J</math> = 13.4, 8.4 Hz, 2H), 7.61 (t, <math>J</math> = 7.7 Hz, 1H), 7.40 (t, <math>J</math> = 7.9 Hz, 1H), 6.95 (d, <math>J</math> = 8.8 Hz, 2H), 3.78 (s, 3H).</p> <p><b><math>^{13}\text{C}</math> NMR</b> (126 MHz, <math>\text{CDCl}_3</math>) <math>\delta</math> 160.83, 156.93, 148.29, 136.68, 132.25, 129.61, 129.52, 128.92, 127.47, 126.93, 125.94, 118.59, 114.25, 55.43.</p>                                                                                                                                                         |
|  | <p><b>2-(4-ethoxyphenyl)quinoline (6af)</b><sup>3</sup> prepared by standard procedure with a yield of 95%, white solid. <b><math>^1\text{H}</math> NMR</b> (500 MHz, <math>\text{CDCl}_3</math>, 25°C, TMS) <math>\delta</math> 8.03 – 7.95 (m, 4H), 7.64 (dd, <math>J</math> = 11.1, 8.4 Hz, 2H), 7.56 (m, <math>J</math> = 8.4, 6.9, 1.4 Hz, 1H), 7.33 (m, <math>J</math> = 8.0, 7.0, 1.1 Hz, 1H), 6.90 – 6.86 (m, 2H), 3.93 (s, 2H), 1.27 (s, 3H).</p> <p><b><math>^{13}\text{C}</math> NMR</b> (126 MHz, <math>\text{CDCl}_3</math>) <math>\delta</math> 160.24, 156.96, 148.32, 136.63, 132.06, 129.59, 129.53, 128.90, 127.47, 126.92, 125.90, 118.55, 114.77, 63.57, 14.86.</p>                                                                                                                                                     |
|  | <p><b>2-(3,4-dimethoxyphenyl)quinoline (6ag)</b> prepared by standard procedure with a yield of 98%, white solid. <b><math>^1\text{H}</math> NMR</b> (500 MHz, <math>\text{CDCl}_3</math>, 25°C, TMS) <math>\delta</math> 8.19 (t, <math>J</math> = 9.4 Hz, 2H), 7.89 (dd, <math>J</math> = 16.5, 5.3 Hz, 2H), 7.83 (d, <math>J</math> = 9.0 Hz, 1H), 7.74 (m, <math>J</math> = 8.4, 6.9, 1.4 Hz, 1H), 7.68</p>                                                                                                                                                                                                                                                                                                                                                                                                                             |

|                                                                                     |                                                                                                                                                                                                                                                                                                                                                                                                                                                                                                                                                                                                                                                                                                                                     |
|-------------------------------------------------------------------------------------|-------------------------------------------------------------------------------------------------------------------------------------------------------------------------------------------------------------------------------------------------------------------------------------------------------------------------------------------------------------------------------------------------------------------------------------------------------------------------------------------------------------------------------------------------------------------------------------------------------------------------------------------------------------------------------------------------------------------------------------|
|                                                                                     | <p>(dd, <math>J = 8.4, 2.1</math> Hz, 1H), 7.52 (t, <math>J = 7.5</math> Hz, 1H), 7.02 (d, <math>J = 8.4</math> Hz, 1H), 4.07 (s, 3H), 3.98 (s, 3H).</p> <p><math>^{13}\text{C NMR}</math> (126 MHz, <math>\text{CDCl}_3</math>) <math>\delta</math> 156.86, 150.38, 149.39, 148.21, 136.69, 132.53, 129.65, 129.49, 127.47, 126.99, 126.03, 120.27, 118.67, 111.02, 110.40, 56.03.</p>                                                                                                                                                                                                                                                                                                                                             |
| 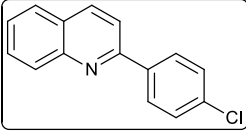   | <p><b>2-(4-chlorophenyl)quinoline (6ah)</b><sup>3</sup> prepared by standard procedure with a yield of 77%, white solid. <math>^1\text{H NMR}</math> (500 MHz, <math>\text{CDCl}_3</math>, 25°C, TMS) <math>\delta</math> 8.24 (d, <math>J = 8.6</math> Hz, 1H), 8.14 (m, <math>J = 15.2, 8.5</math> Hz, 3H), 7.88 – 7.81 (m, 2H), 7.74 (t, <math>J = 7.5</math> Hz, 1H), 7.55 (t, <math>J = 7.3</math> Hz, 1H), 7.50 (d, <math>J = 8.4</math> Hz, 2H).</p> <p><math>^{13}\text{C NMR}</math> (126 MHz, <math>\text{CDCl}_3</math>) <math>\delta</math> 156.05, 148.24, 138.07, 137.02, 135.56, 129.89, 129.69, 129.05, 128.85, 127.51, 127.24, 126.54, 118.62.</p>                                                                 |
|    | <p><b>2-(4-fluorophenyl)quinoline (6ai)</b><sup>1</sup> prepared by standard procedure with a 62% yielding white solid. <math>^1\text{H NMR}</math> (500 MHz, <math>\text{CDCl}_3</math>, 25°C, TMS) <math>\delta</math> 8.23 (d, <math>J = 8.6</math> Hz, 1H), 8.20 – 8.13 (m, 3H), 7.85 (d, <math>J = 8.6</math> Hz, 2H), 7.74 (t, <math>J = 7.7</math> Hz, 1H), 7.54 (t, <math>J = 7.9</math> Hz, 1H), 7.22 (t, <math>J = 8.7</math> Hz, 2H).</p> <p><math>^{13}\text{C NMR}</math> (126 MHz, <math>\text{CDCl}_3</math>) <math>\delta</math> 164.81, 162.83, 156.32, 148.18, 137.02, 129.87, 129.57, 129.50, 129.43, 127.52, 127.10, 126.41, 118.73.</p>                                                                        |
|  | <p><b>2-(3-(trifluoromethyl)phenyl)quinoline (6aj)</b><sup>3</sup> prepared by standard procedure with a yield of 98%, white solid. <math>^1\text{H NMR}</math> (500 MHz, <math>\text{CDCl}_3</math>, 25°C, TMS) <math>\delta</math> 8.42 (s, 1H), 8.29 (d, <math>J = 7.8</math> Hz, 1H), 8.18 (d, <math>J = 8.6</math> Hz, 1H), 8.14 (d, <math>J = 8.4</math> Hz, 1H), 7.85 – 7.75 (m, 2H), 7.74 – 7.63 (m, 2H), 7.58 (t, <math>J = 7.8</math> Hz, 1H), 7.50 (t, <math>J = 7.5</math> Hz, 1H).</p> <p><math>^{13}\text{C NMR}</math> (126 MHz, <math>\text{CDCl}_3</math>) <math>\delta</math> 155.58, 148.25, 140.37, 137.19, 130.72, 130.01, 129.82, 129.33, 127.54, 127.40, 126.80, 125.92, 125.89, 124.45, 124.42, 118.59.</p> |

## References:

1. R. Sharma, A. Mondal, A. Samanta, N. Biswas, B. Das, D. Srimani, *Adv. cat* 364 (2022) 2429–2437.
2. M. Nallagangula, C. Sujatha, V. T. Bhat, K. Namitharan, *chem. commun* 55 (2019) 8490–8493.
3. R. Pothikumar, V. T. Bhat, K. Namitharan, *Chem. Commun*, 56 (2020) 13607– 13610.

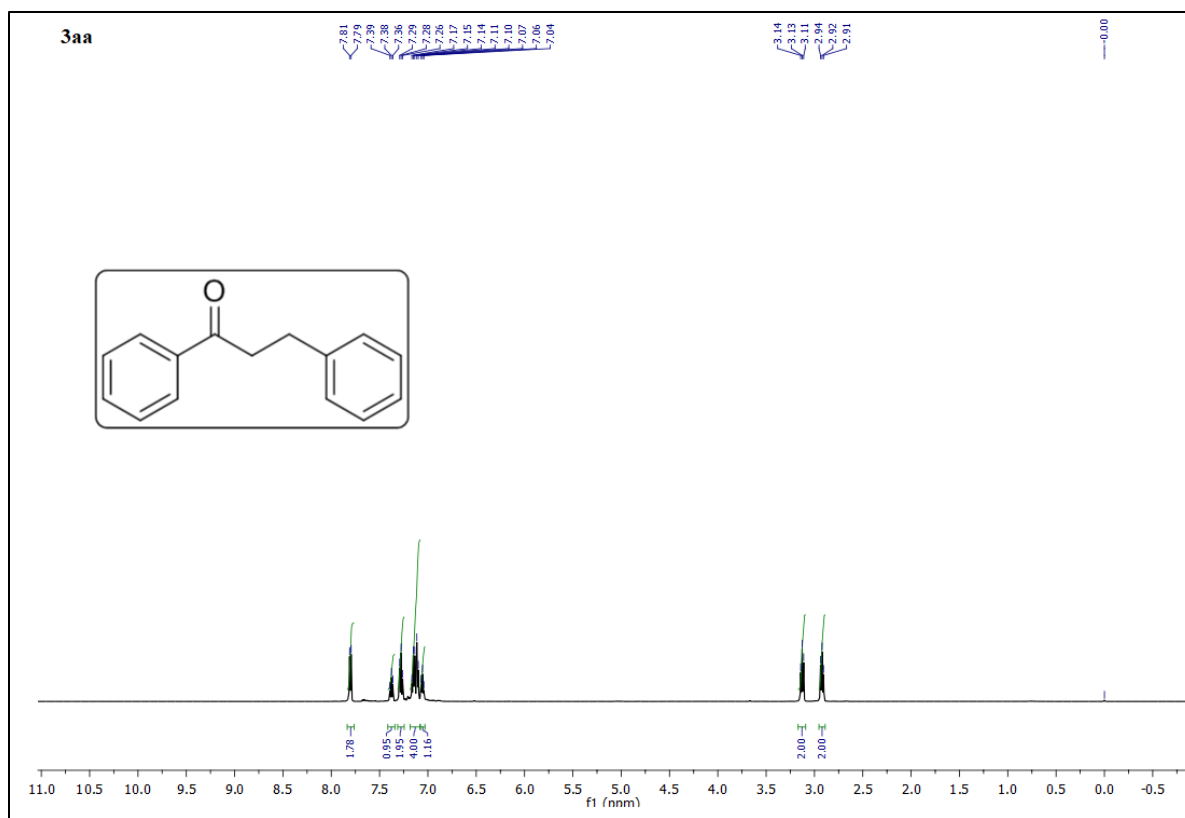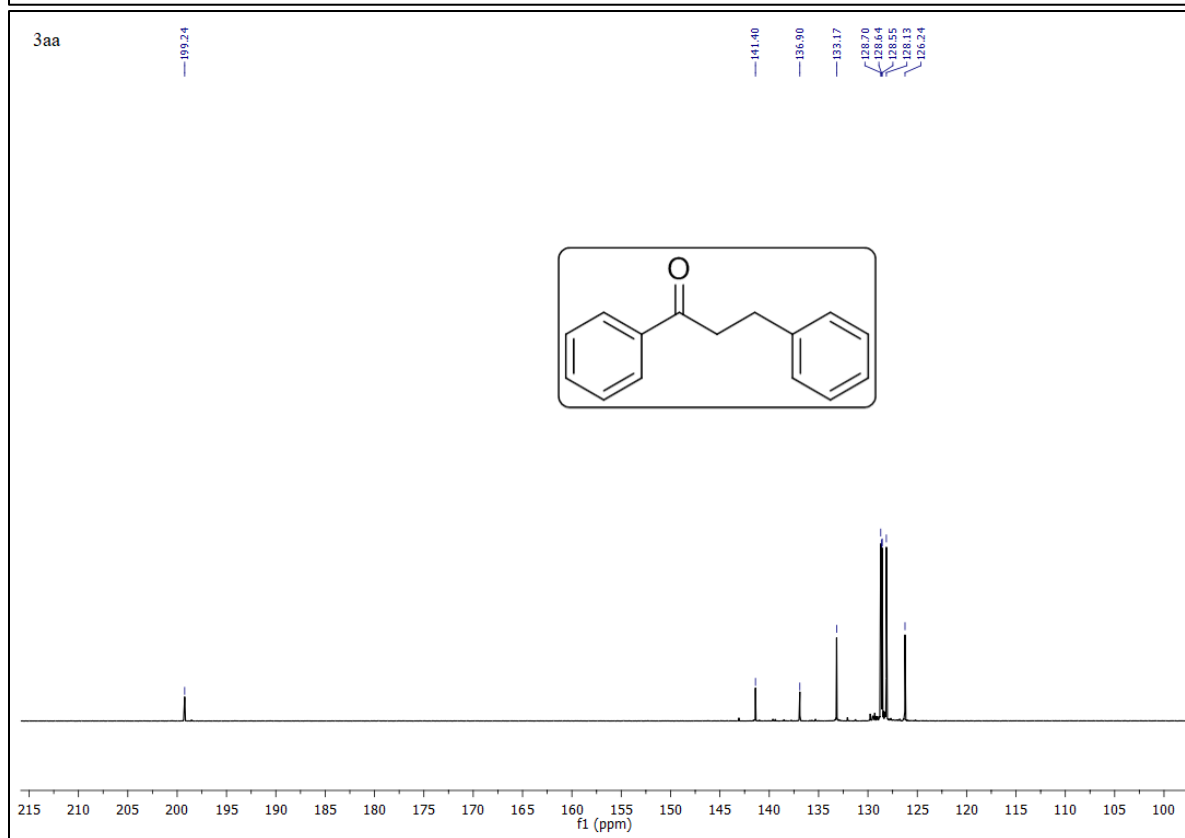

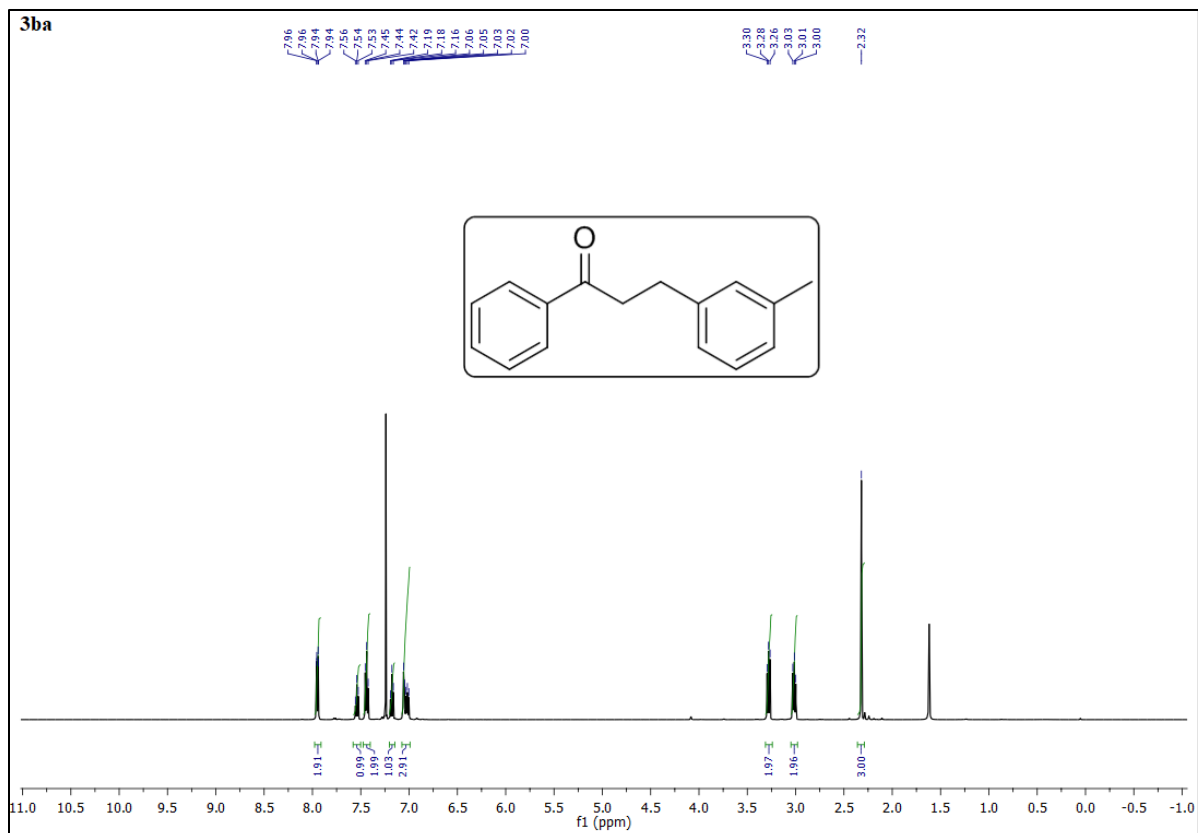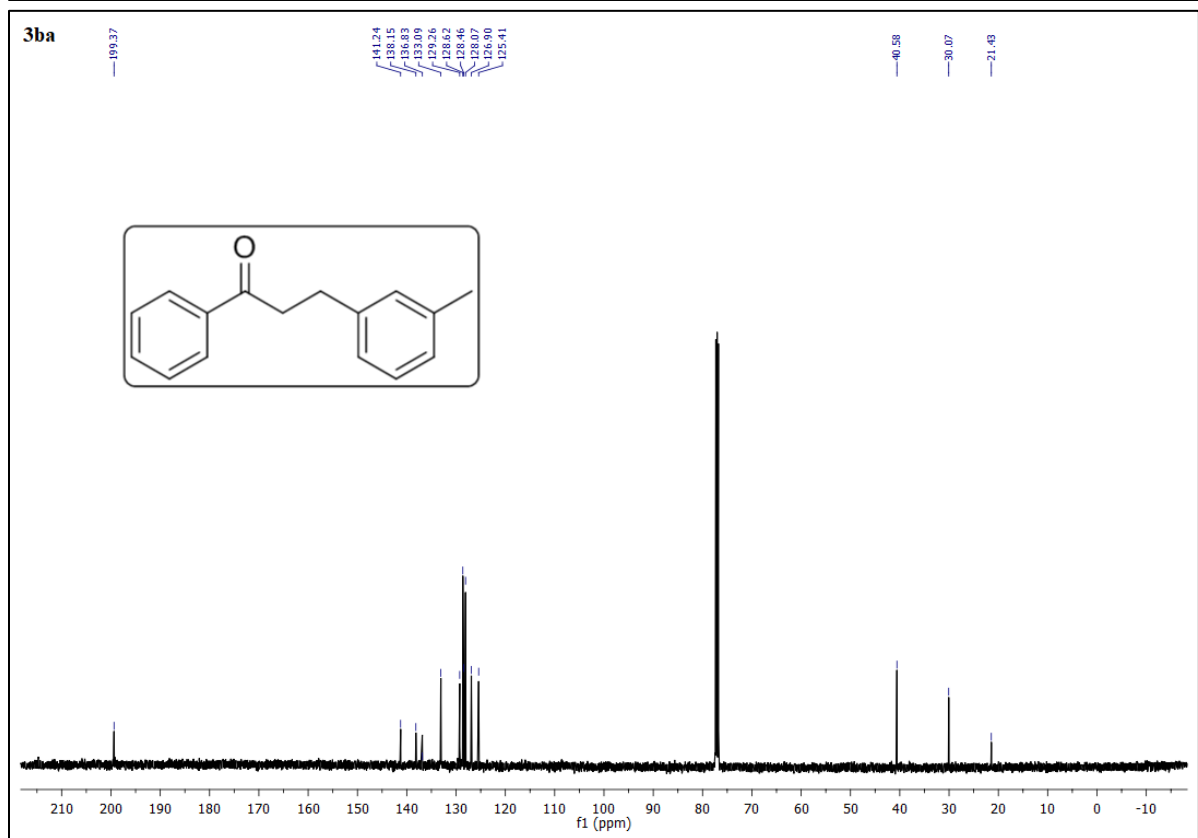

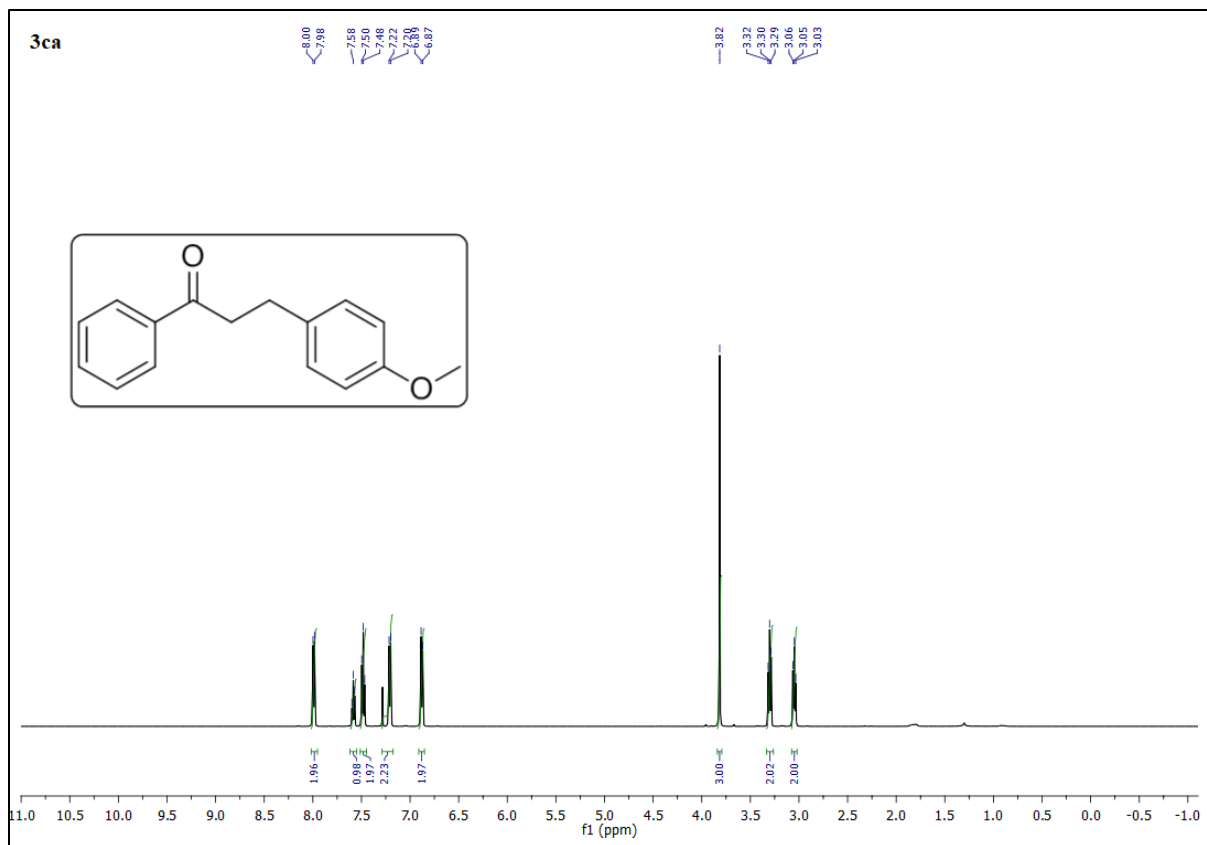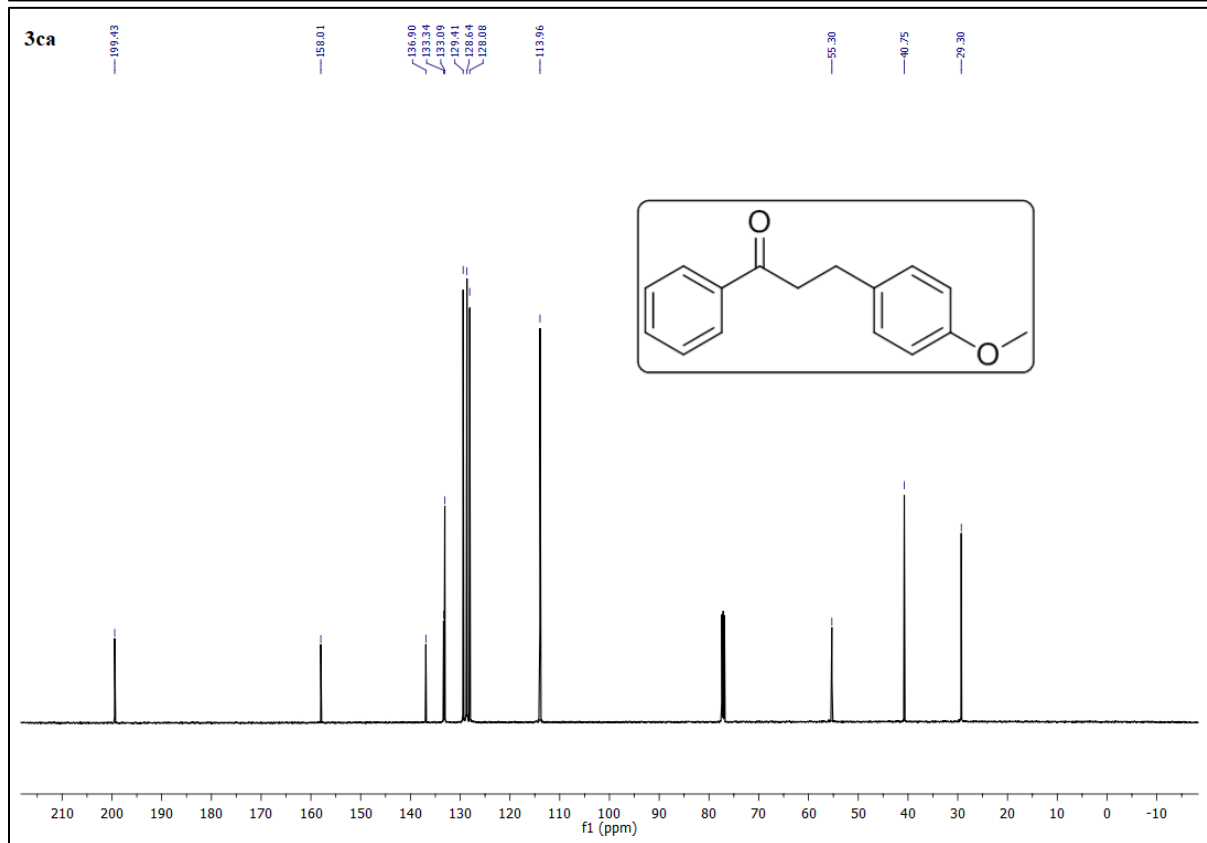

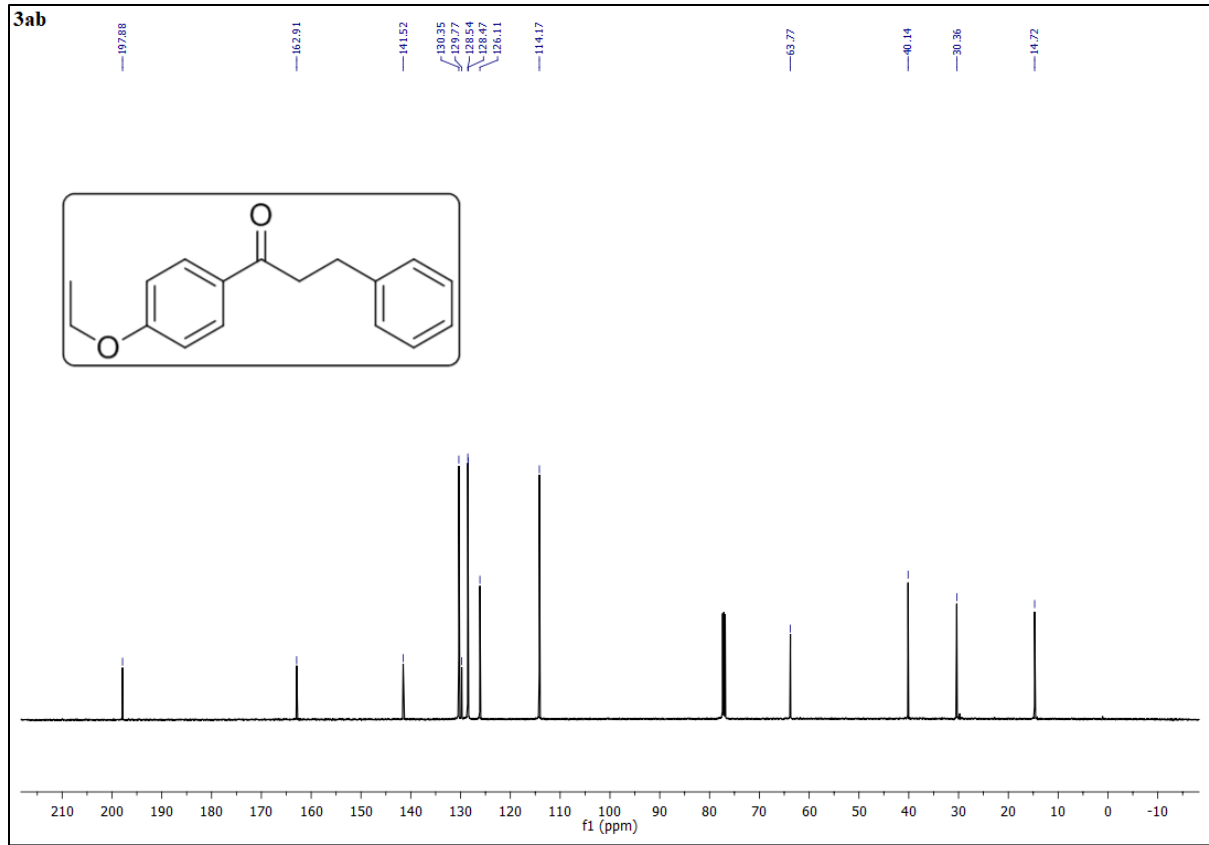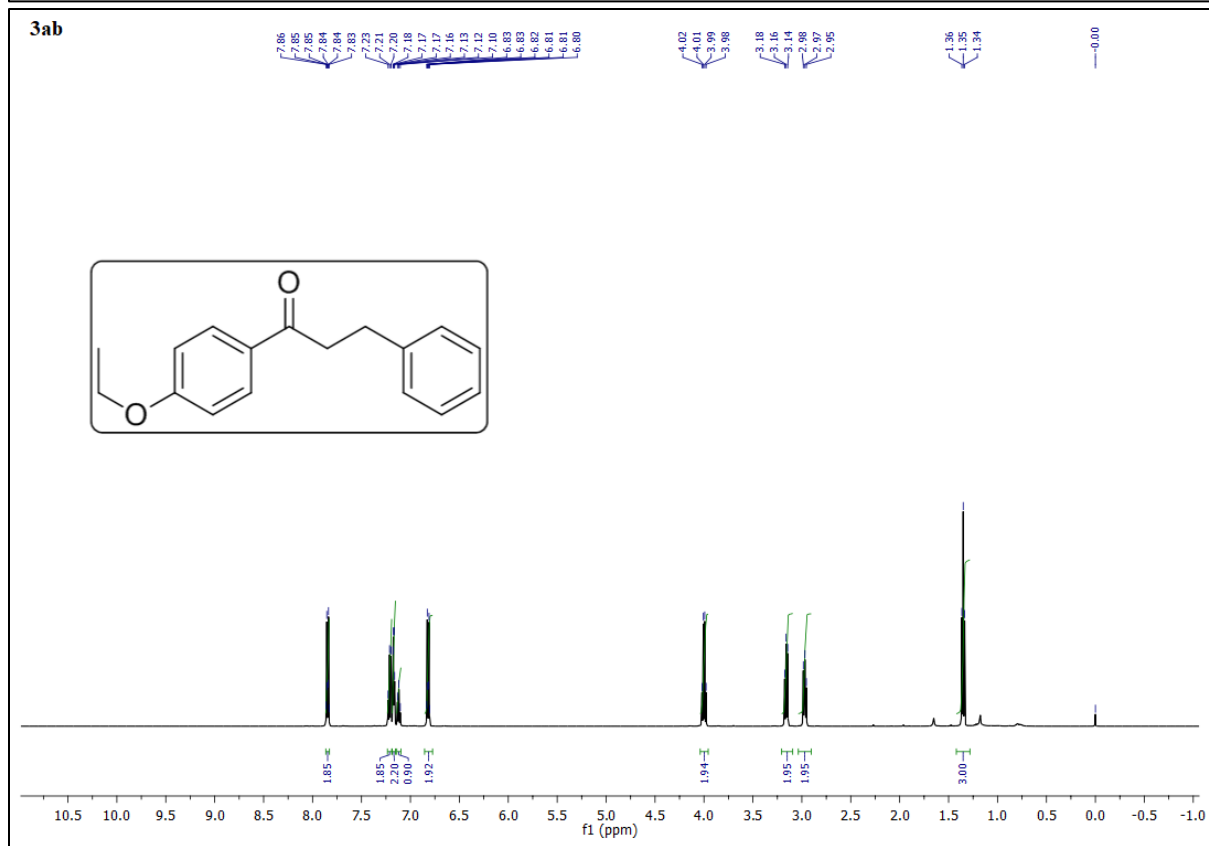



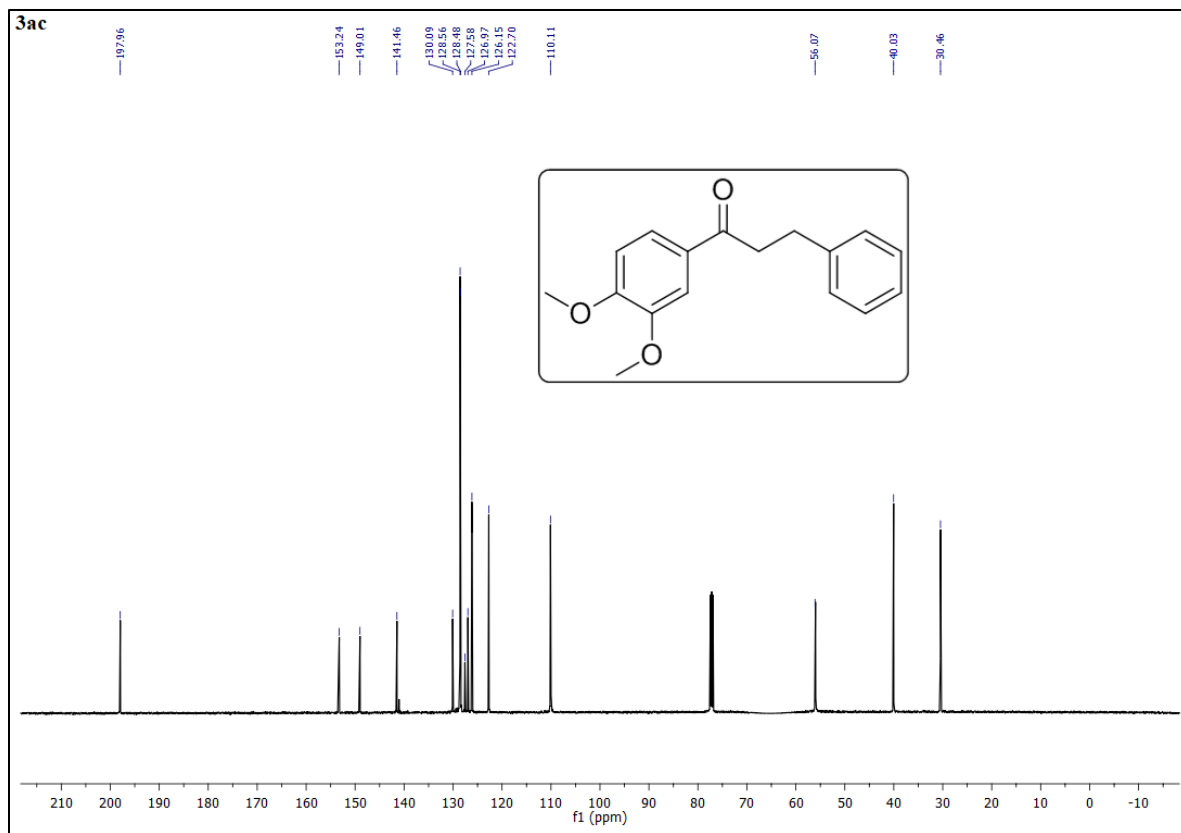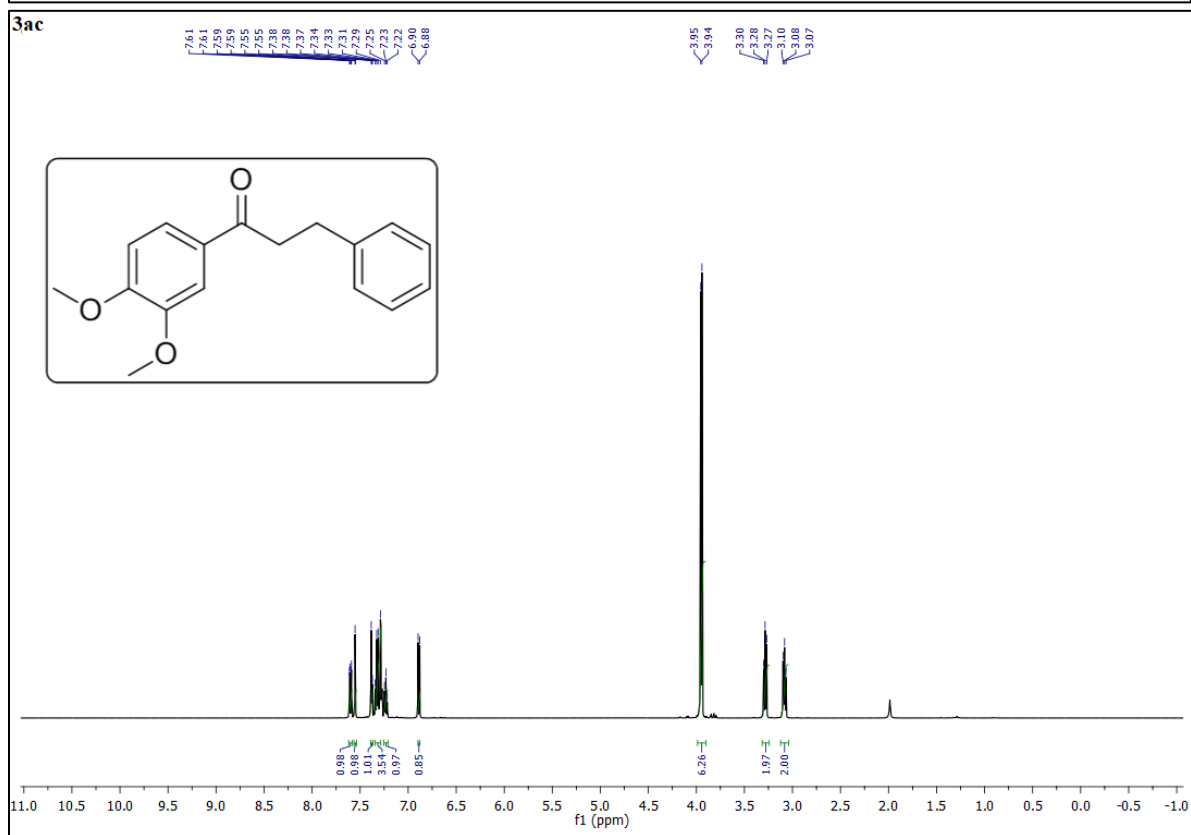

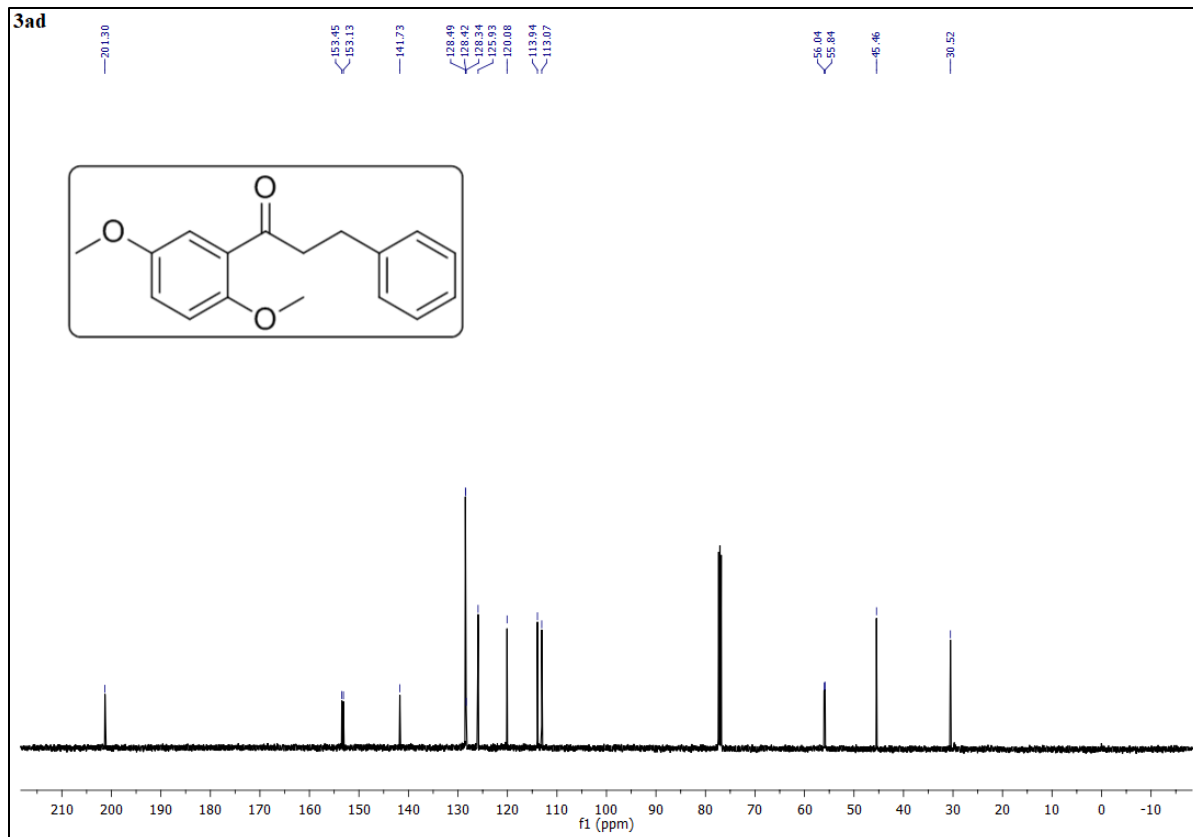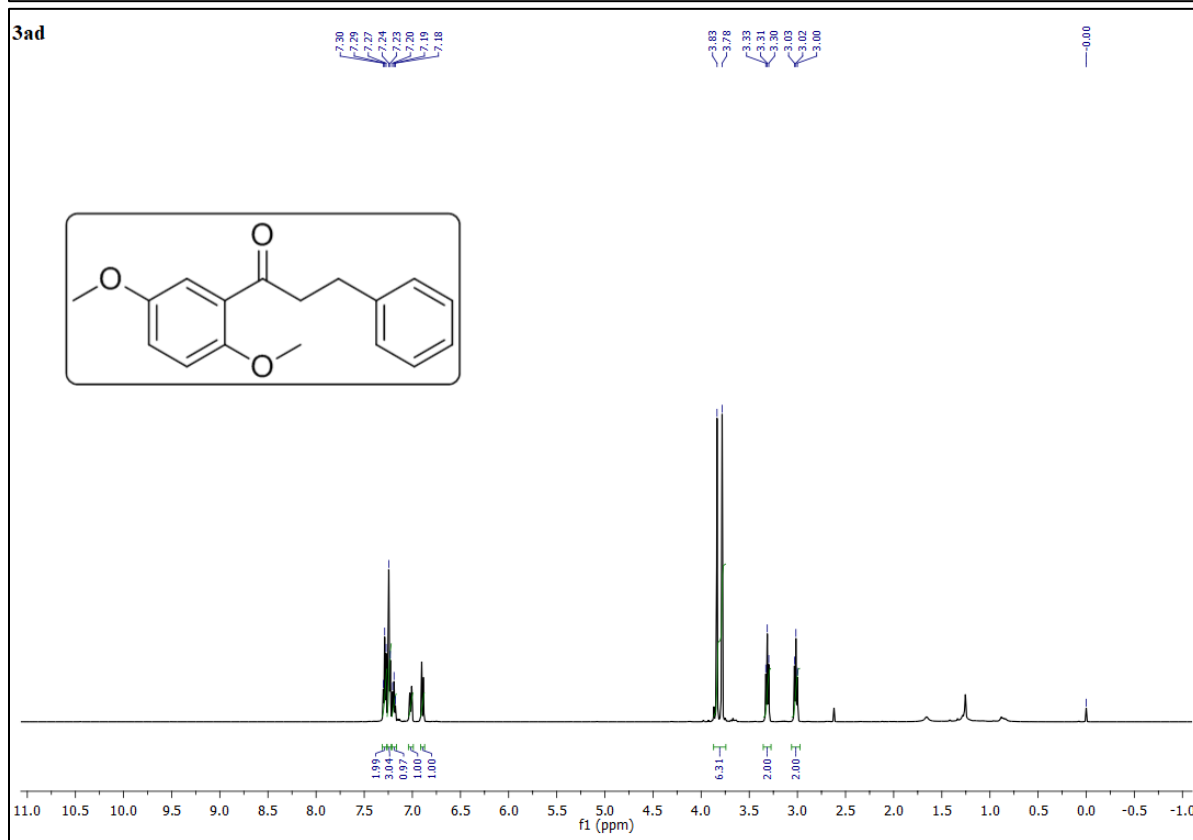

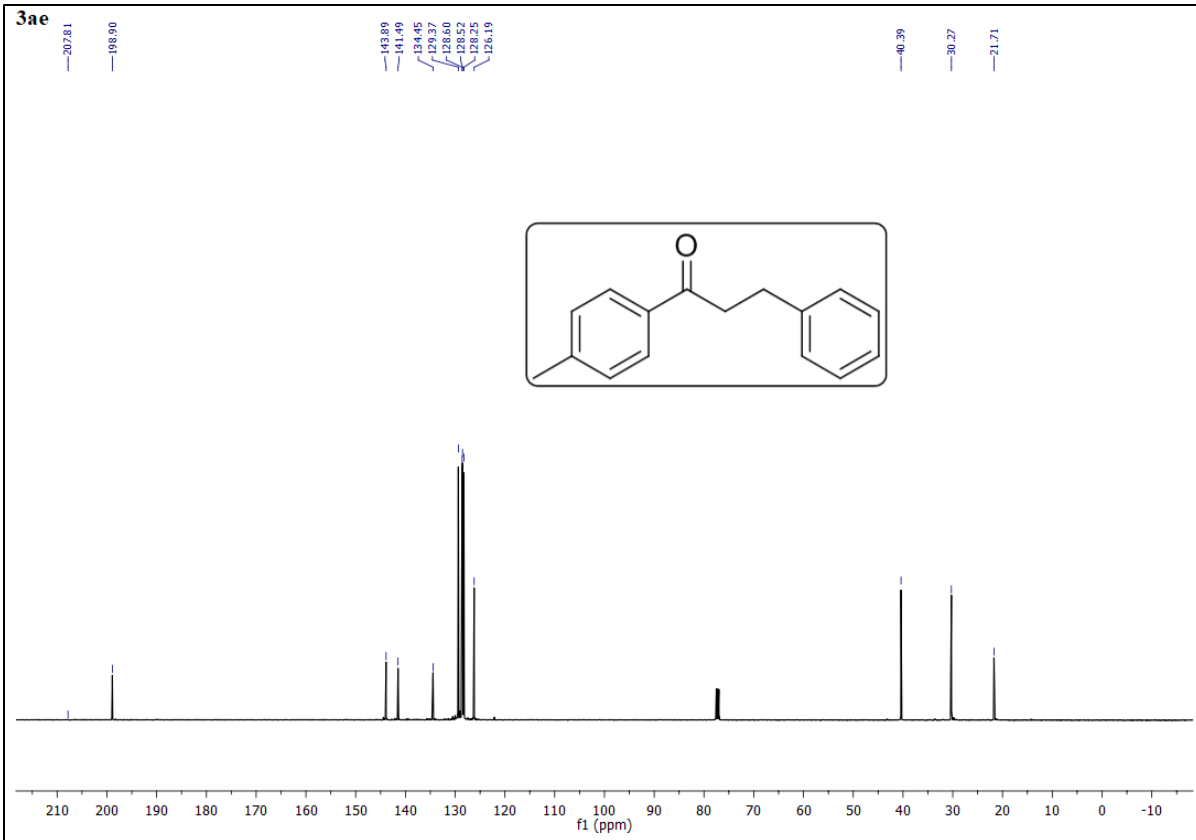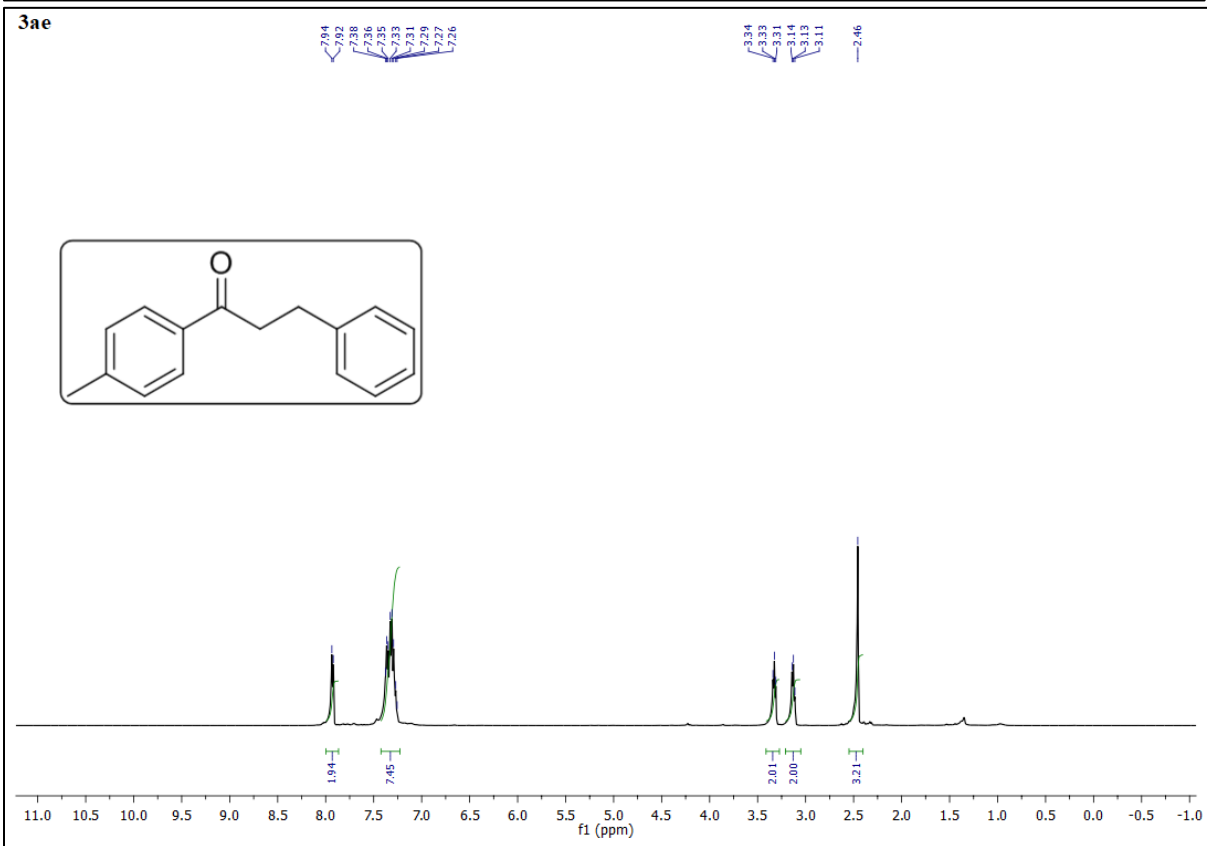

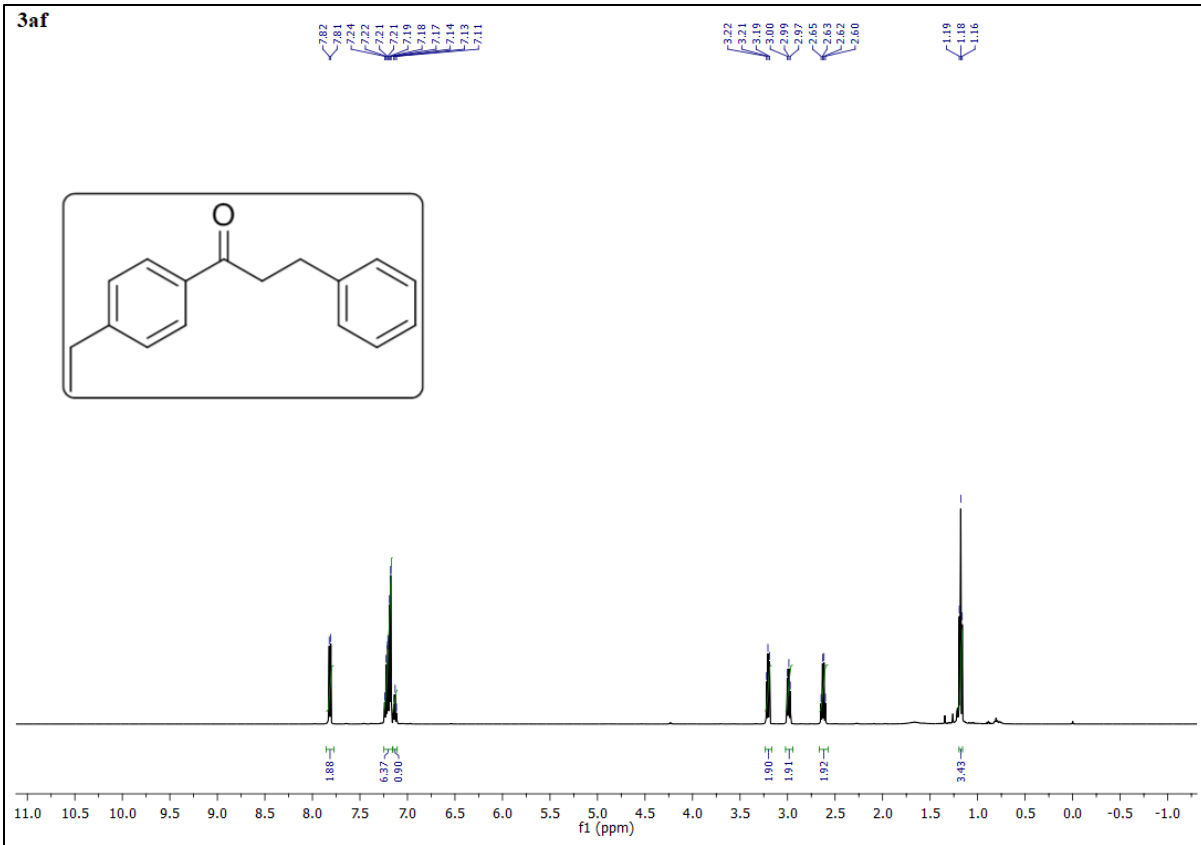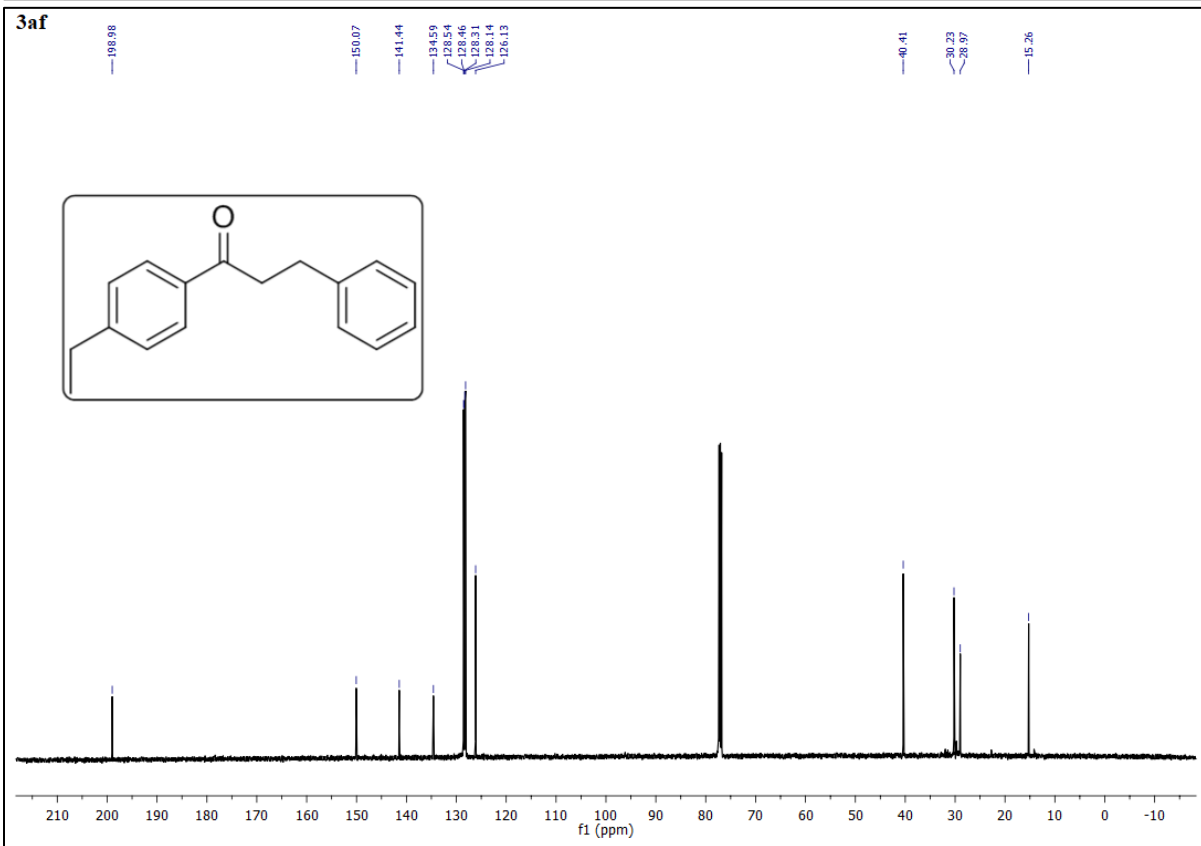

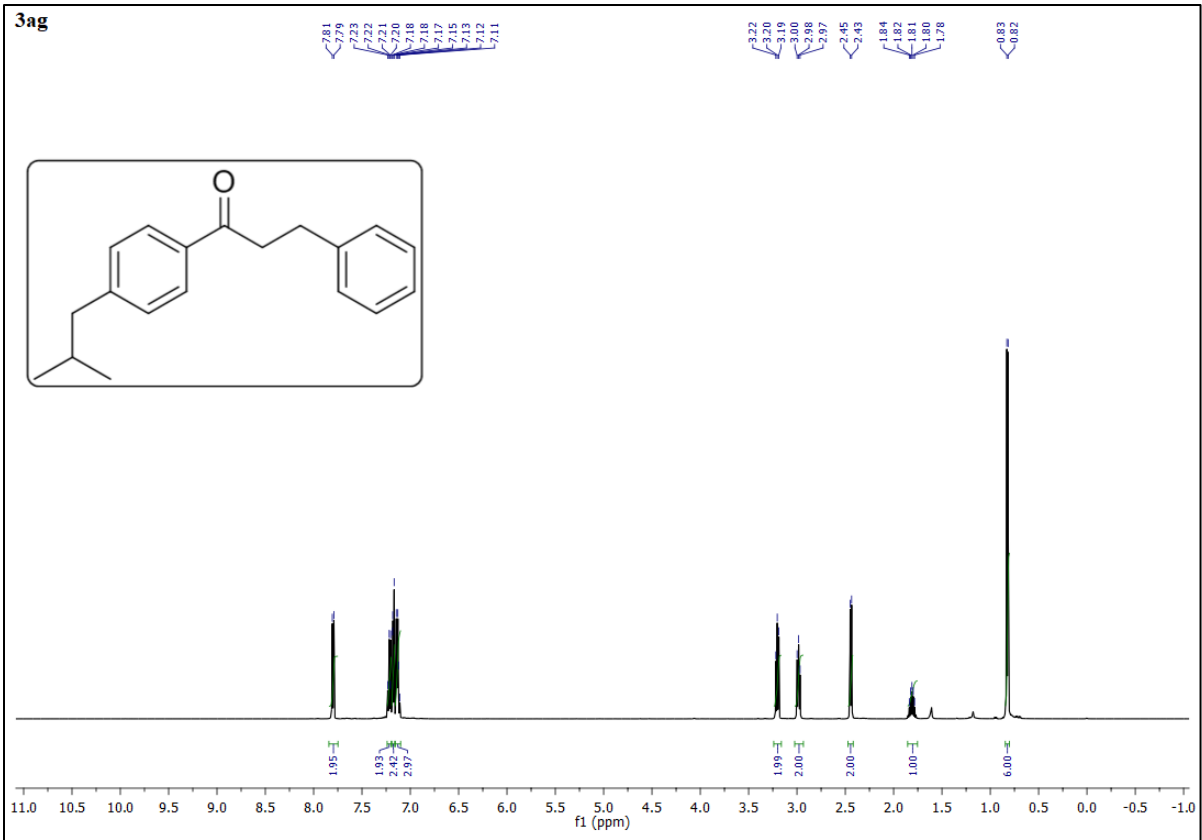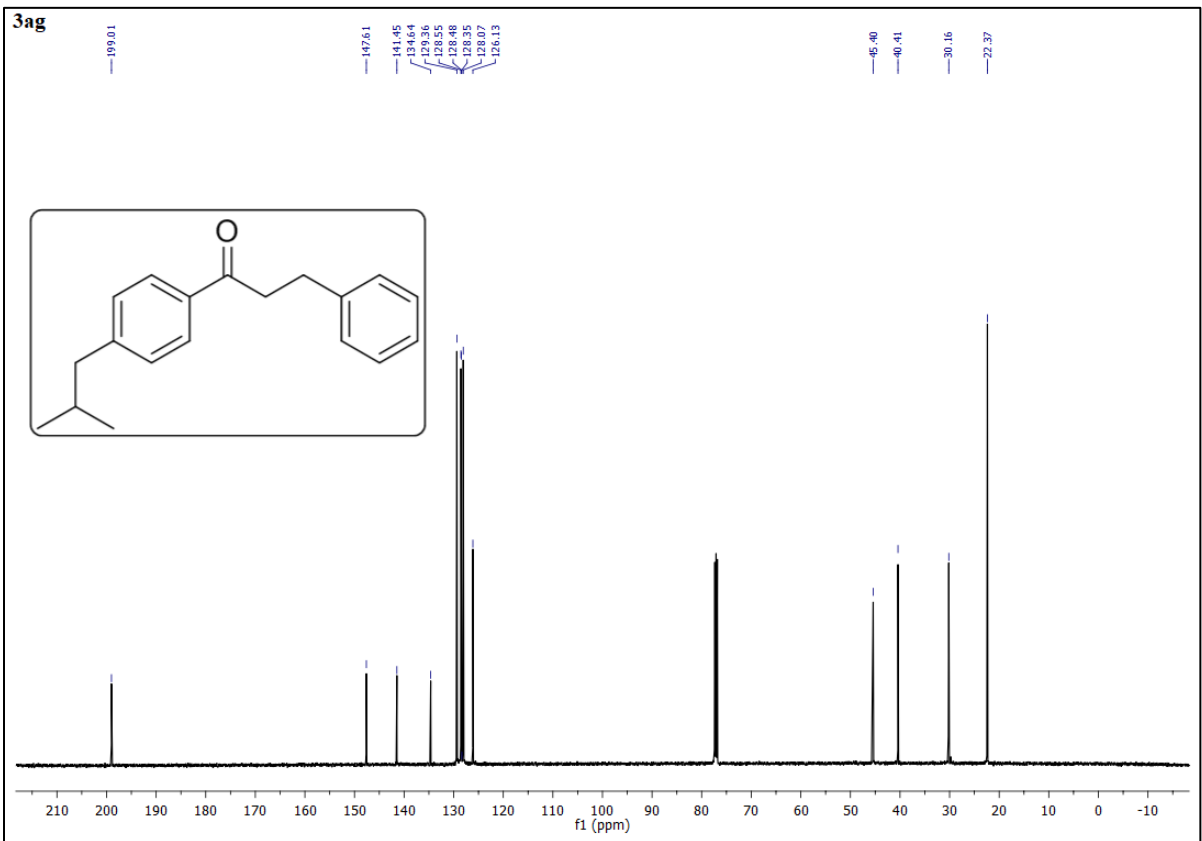

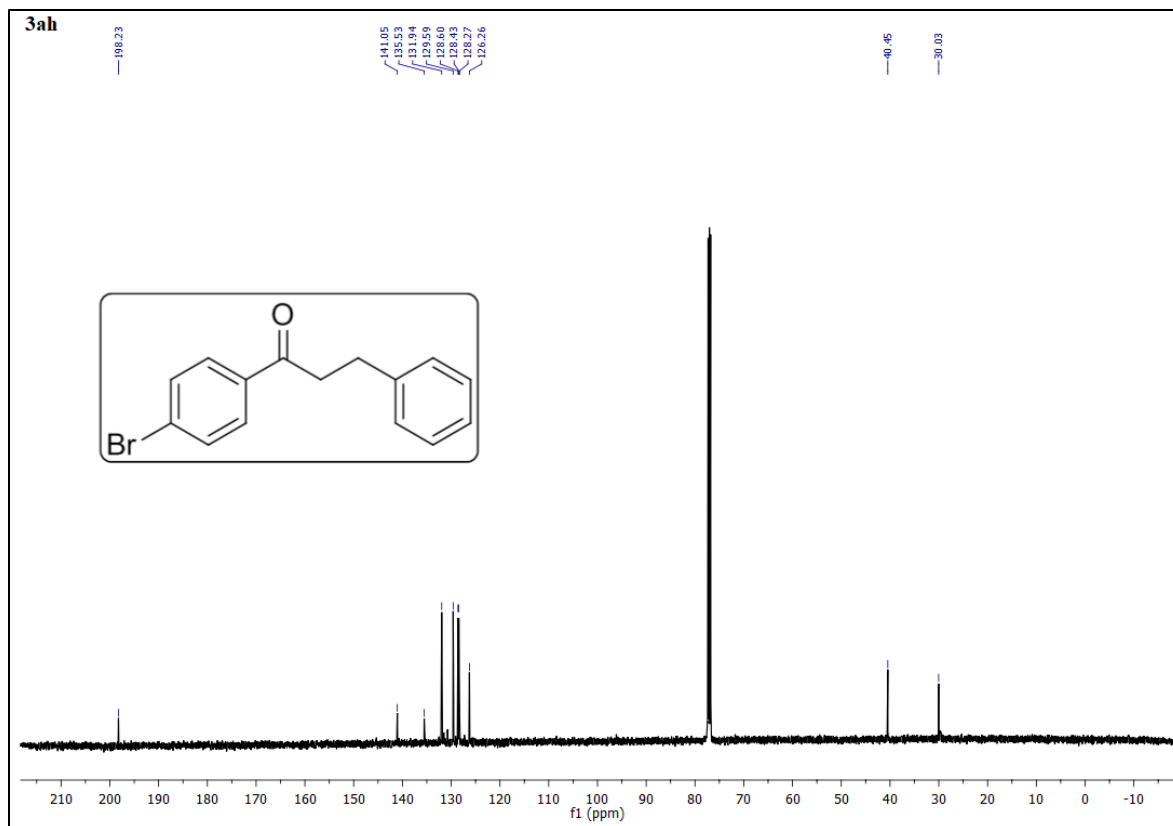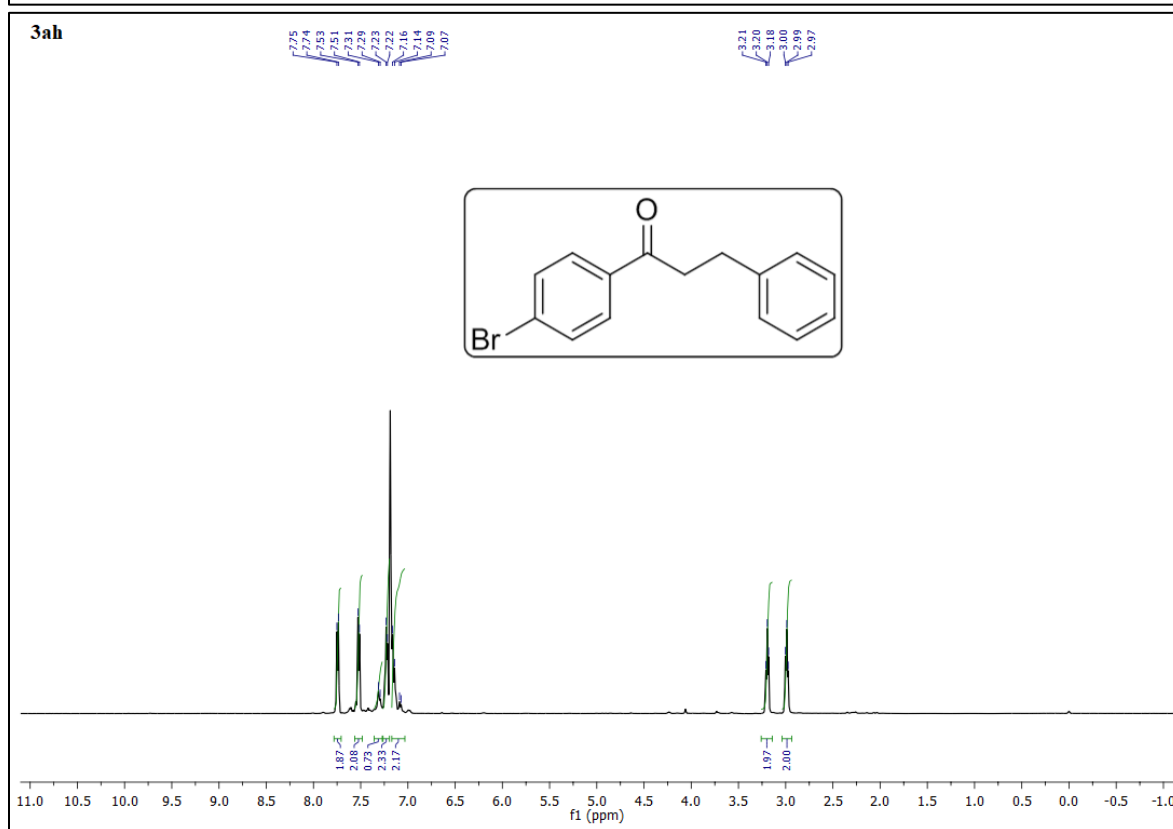

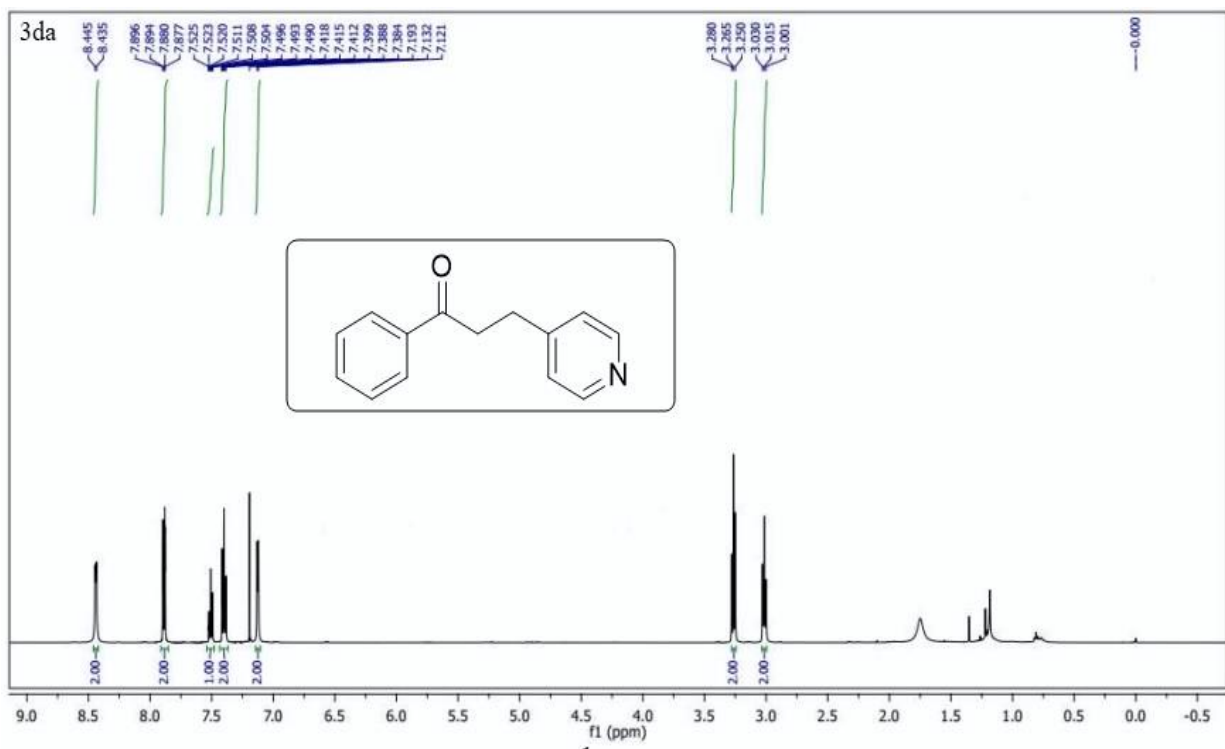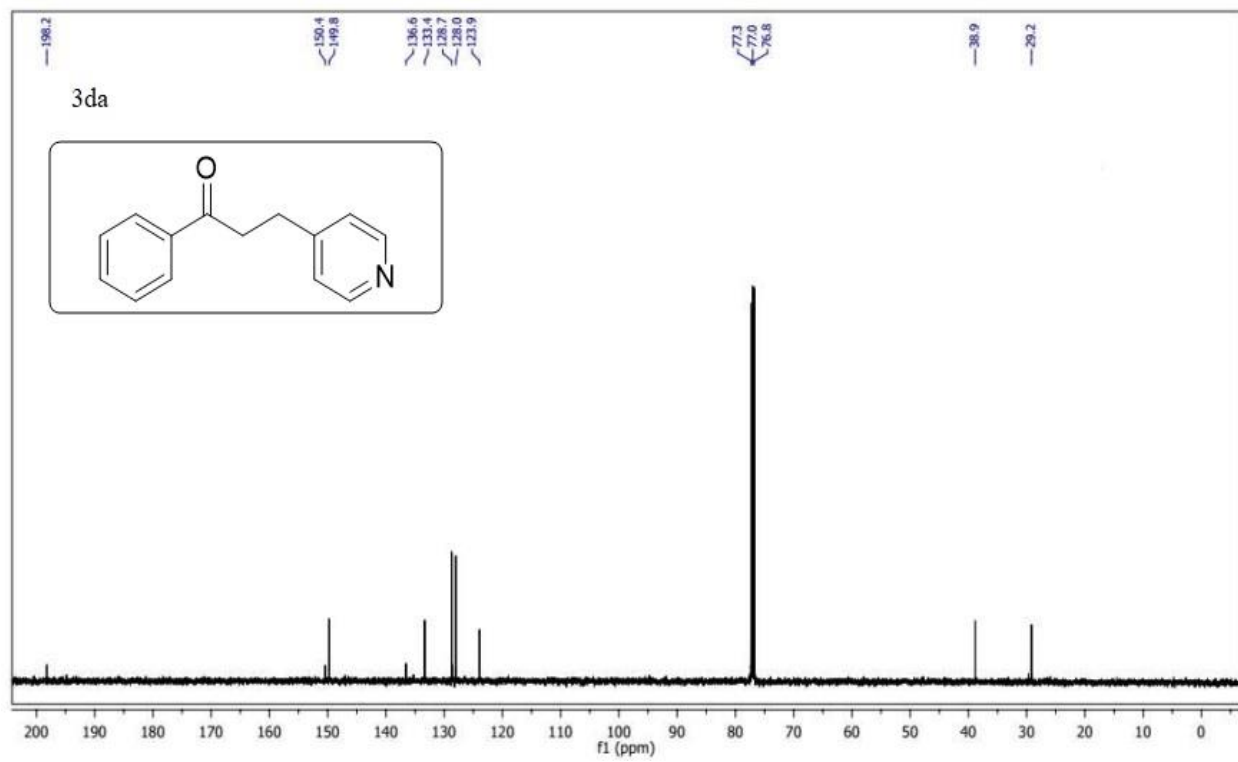

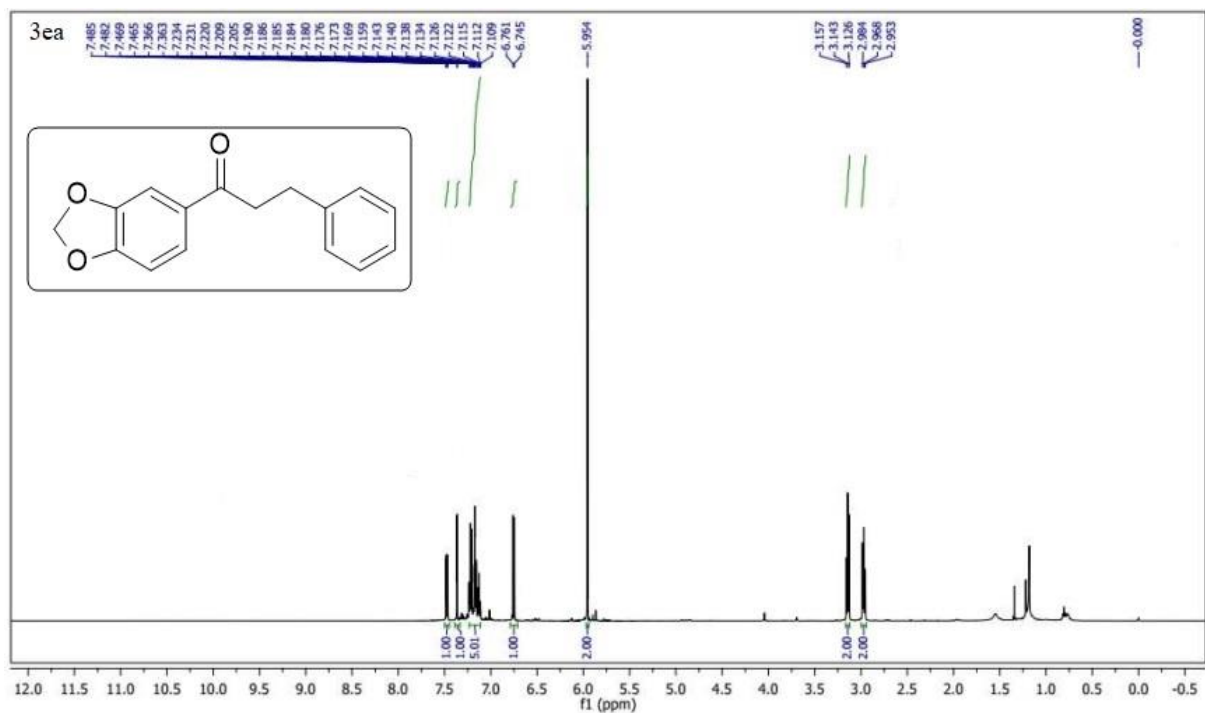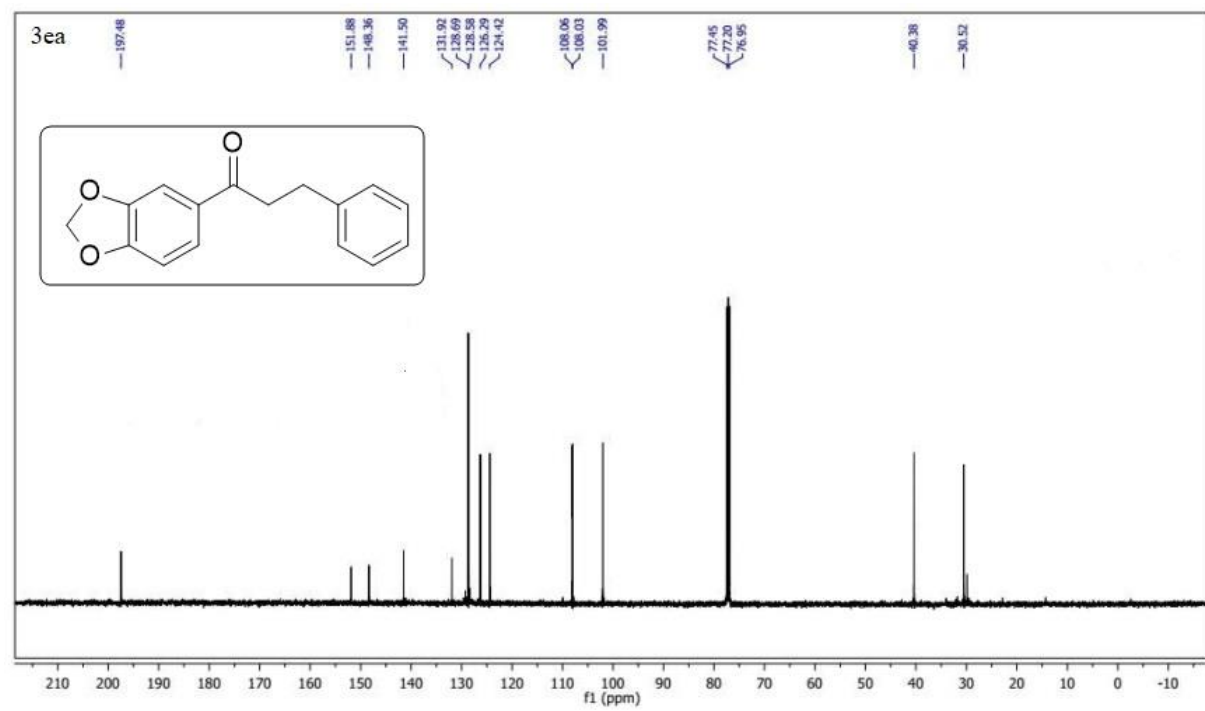



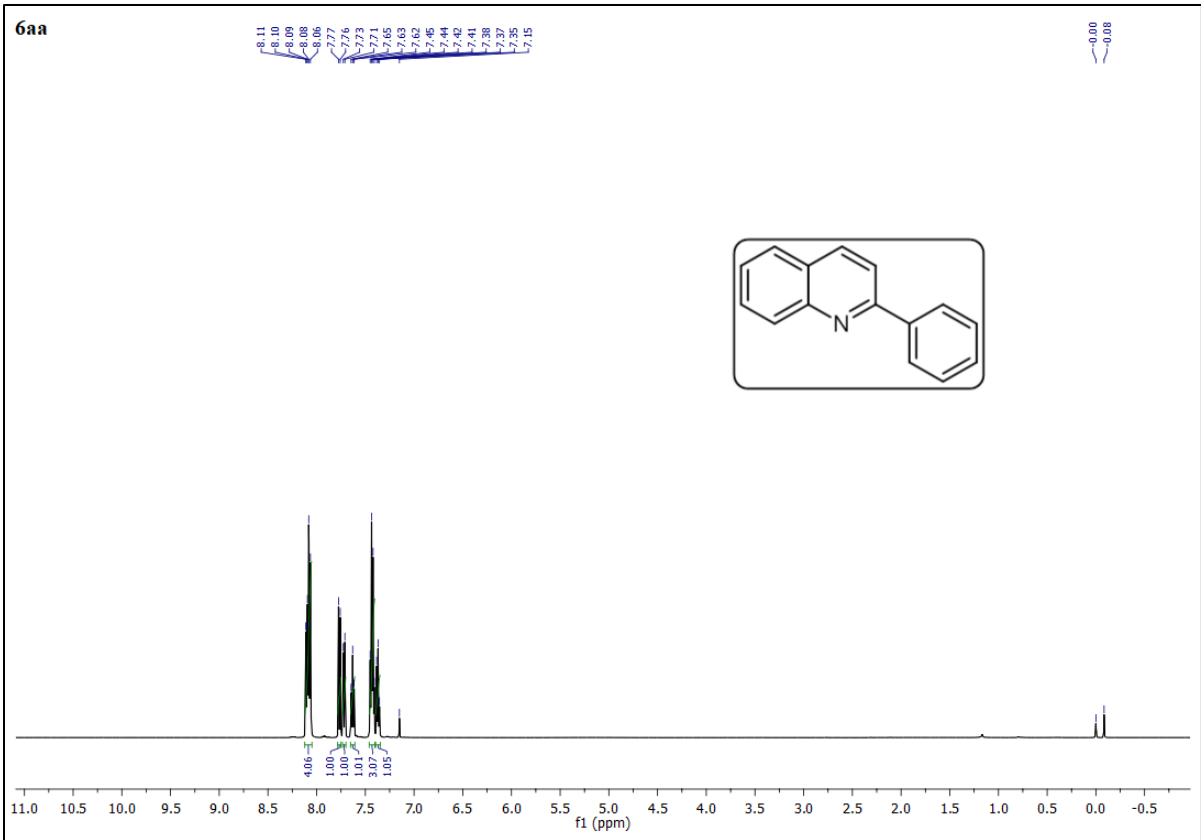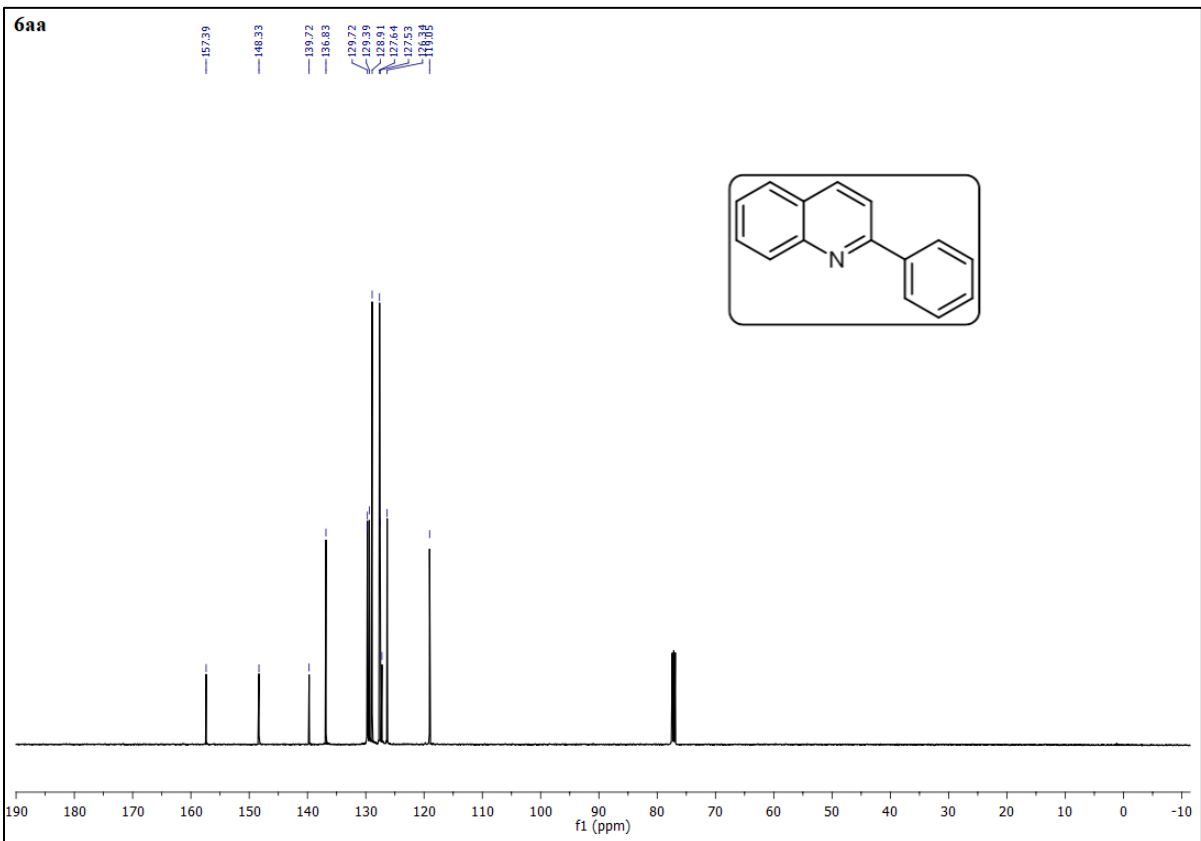

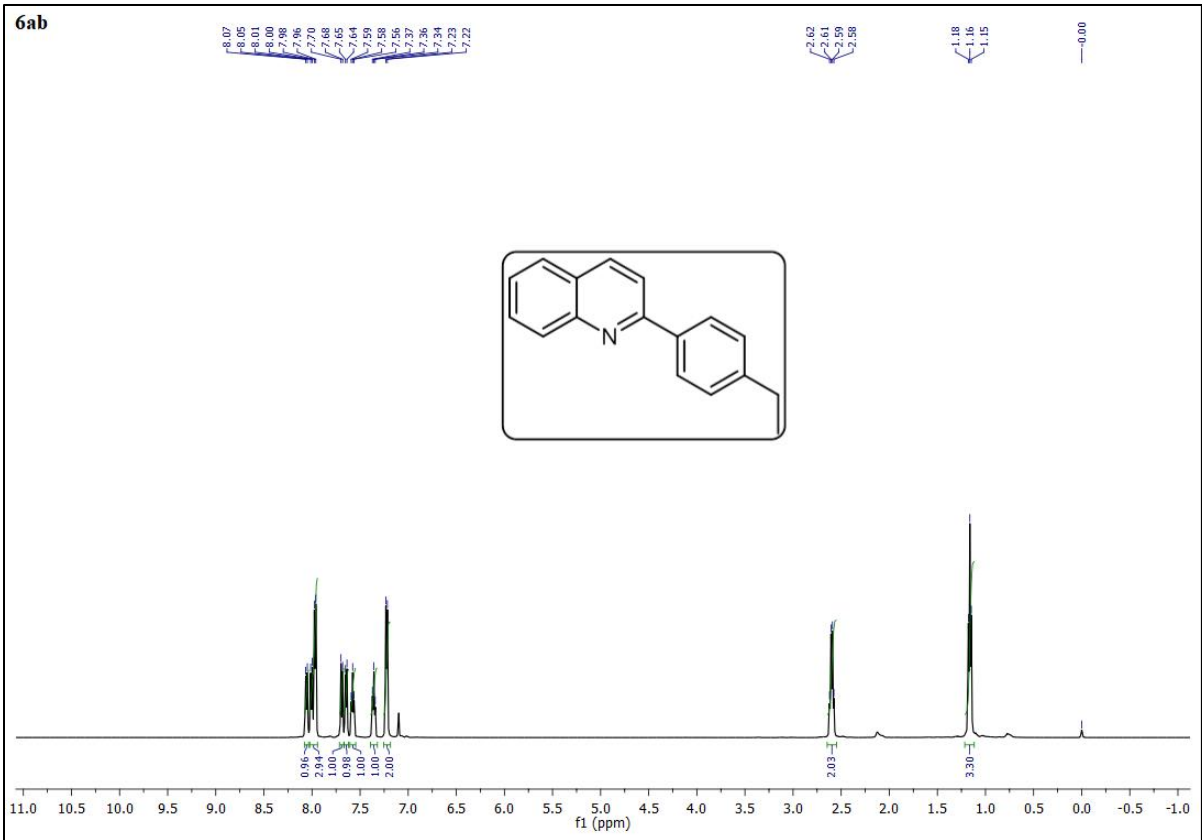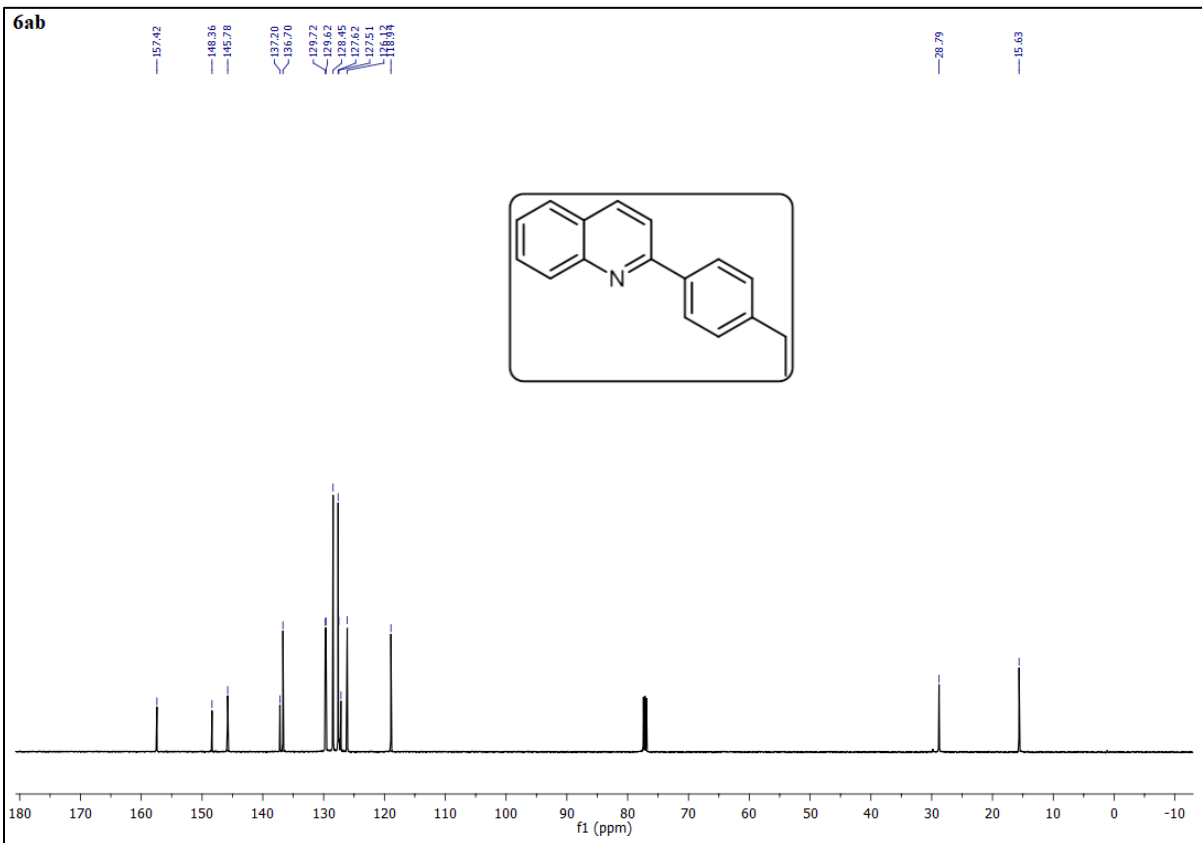

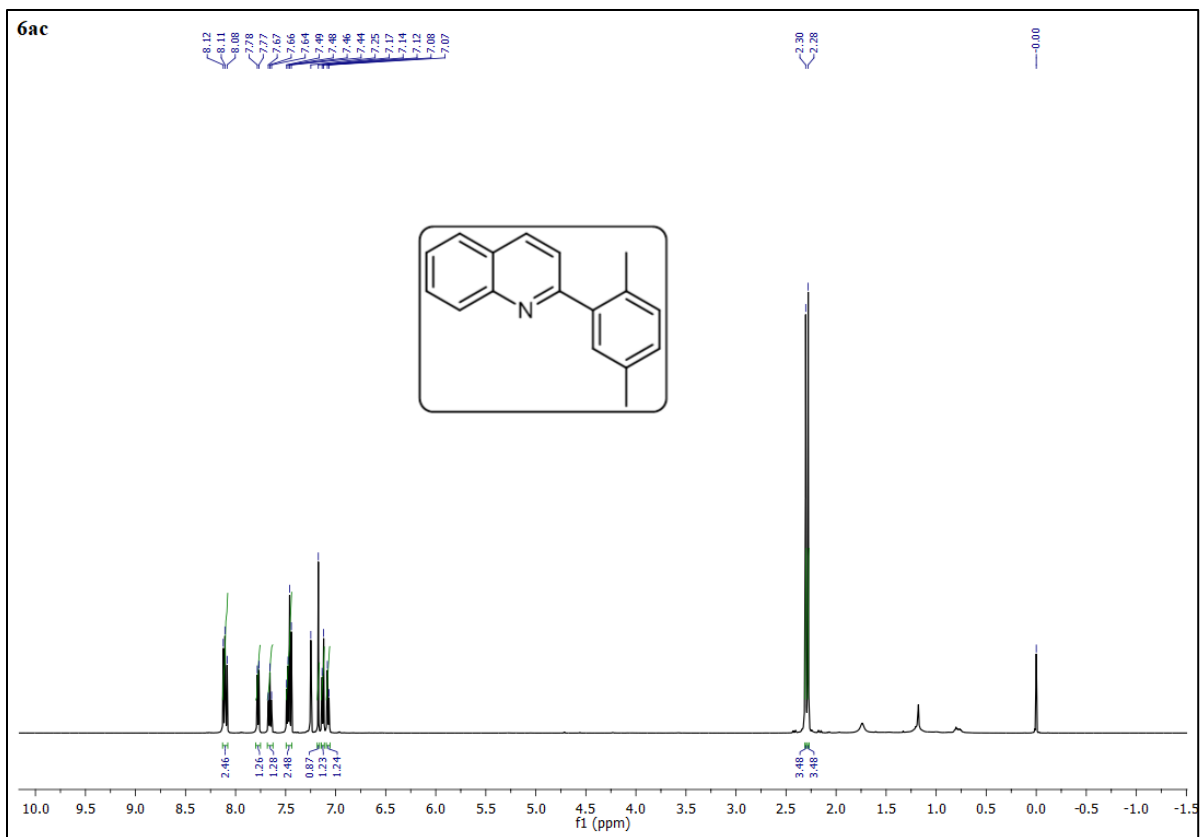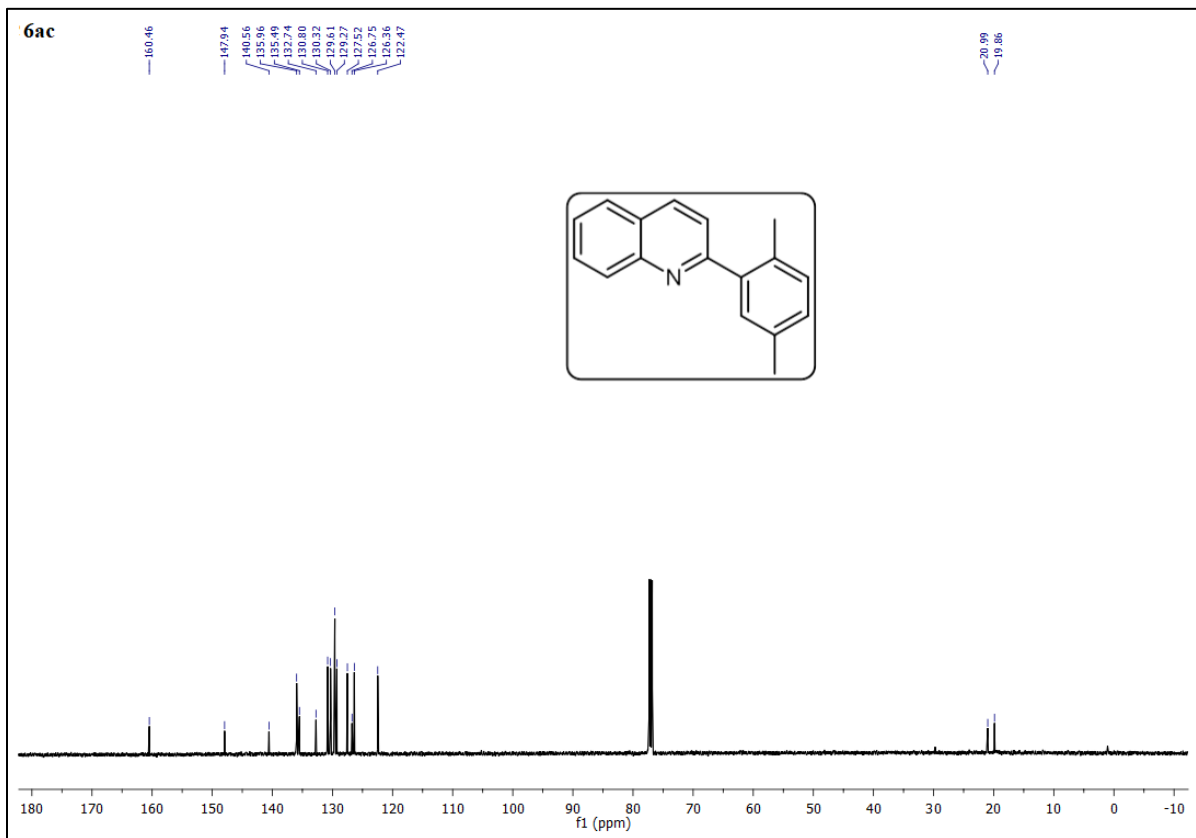

6ad

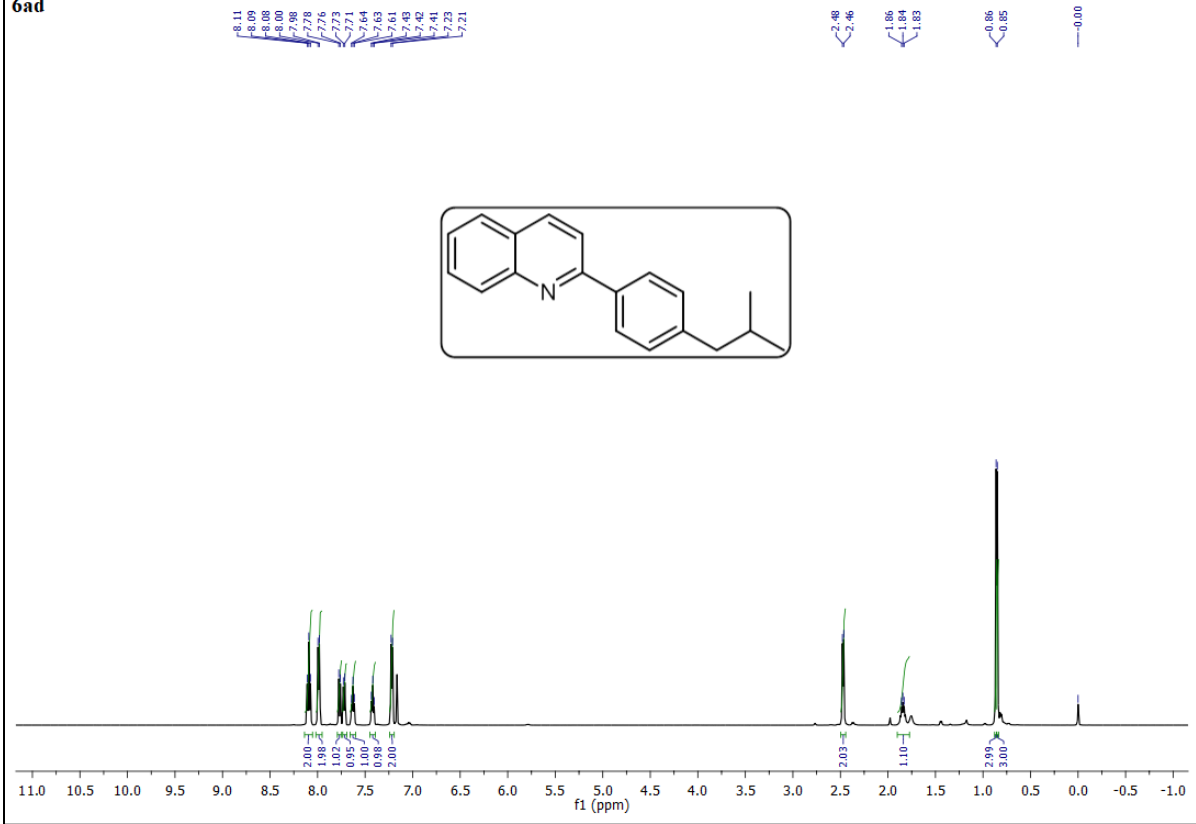

6ad

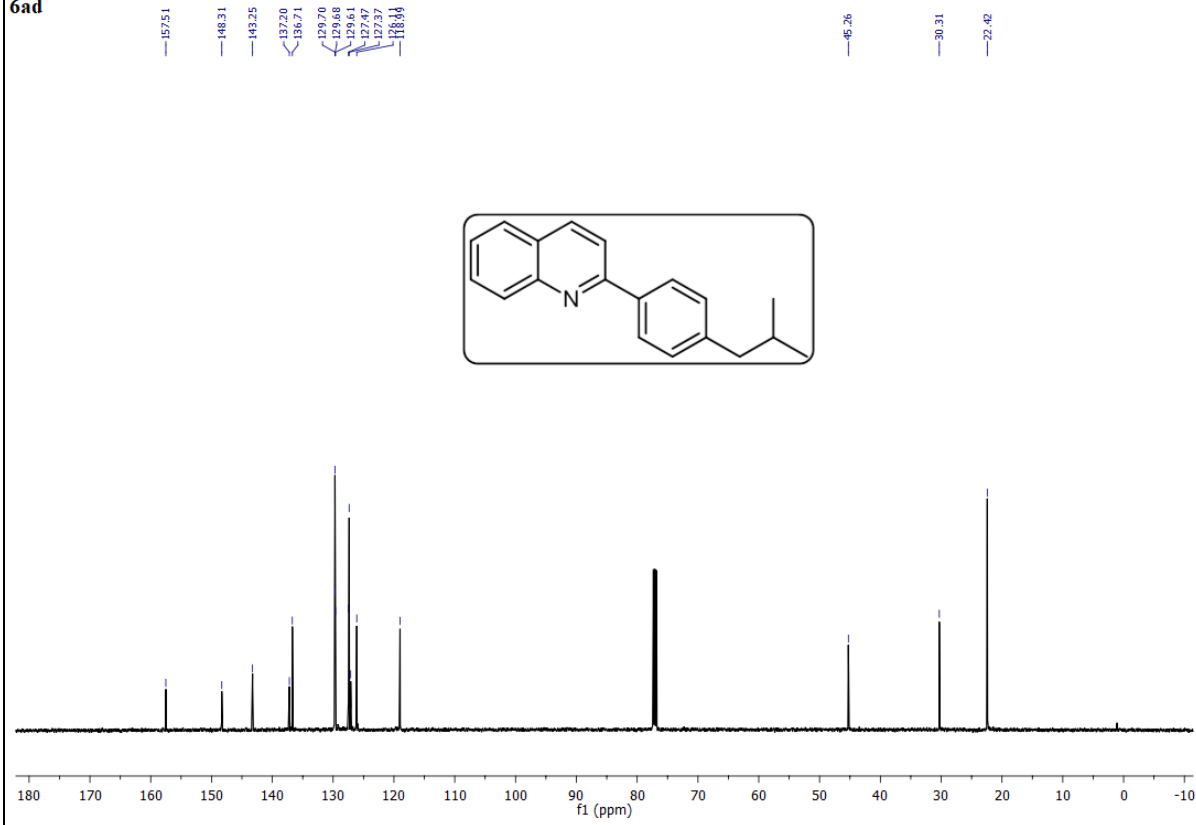

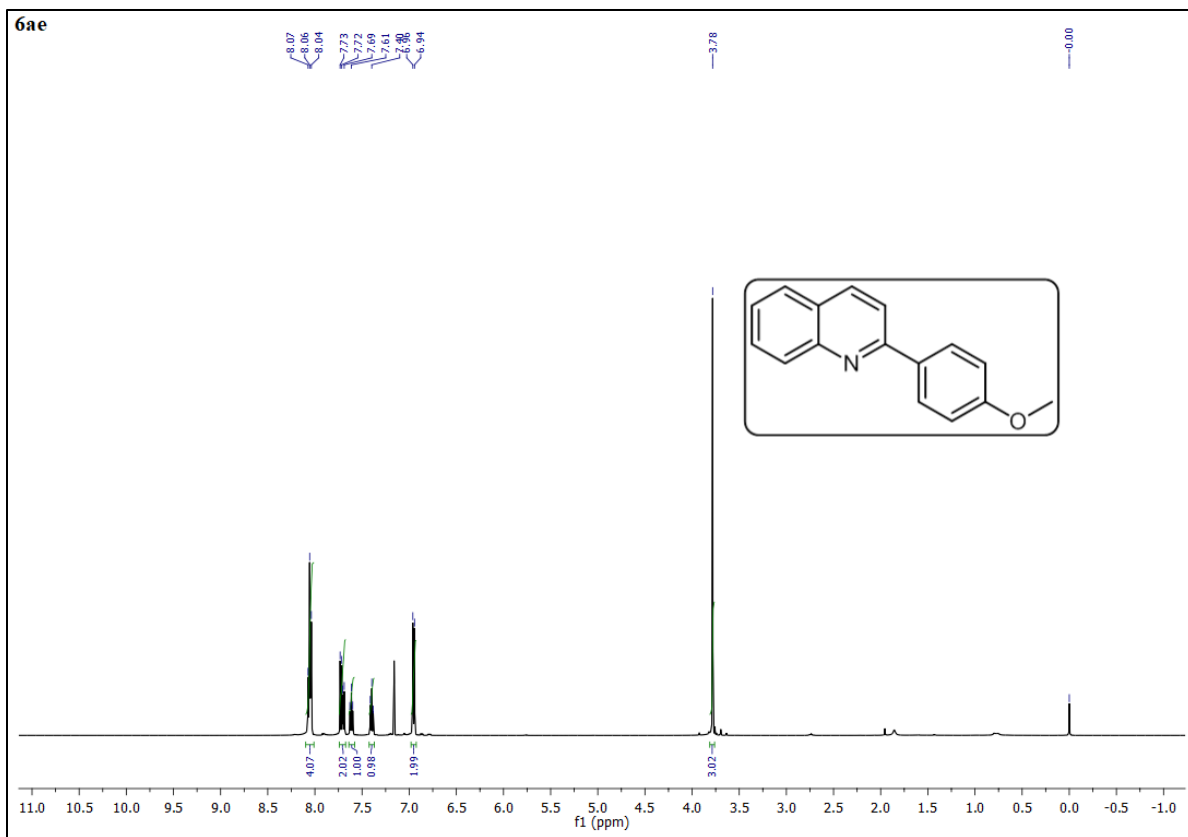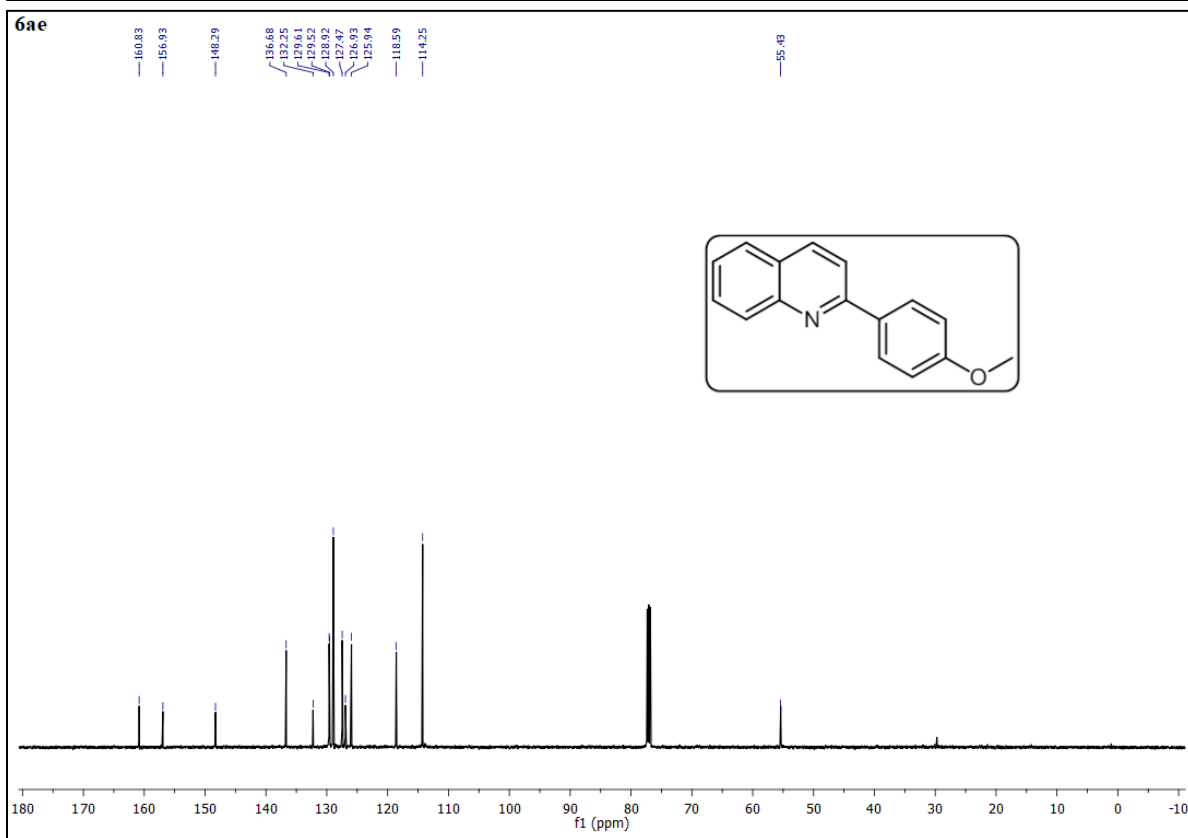

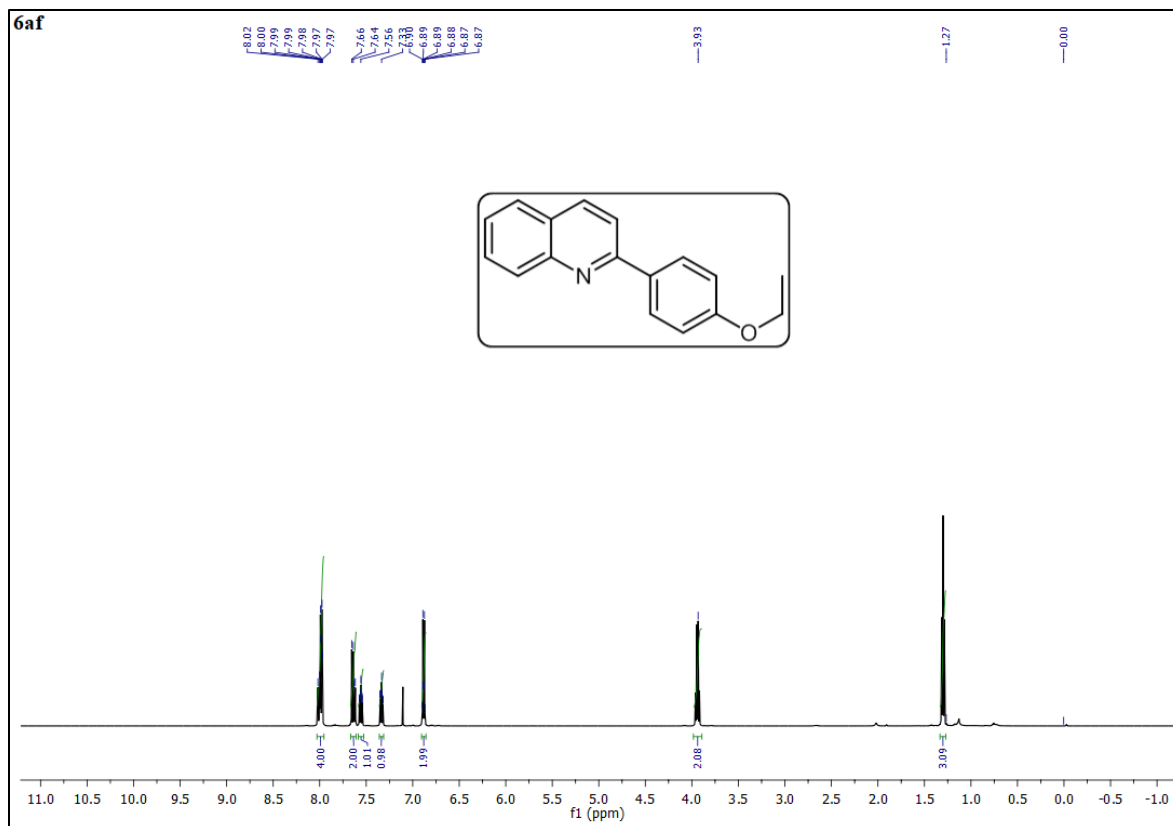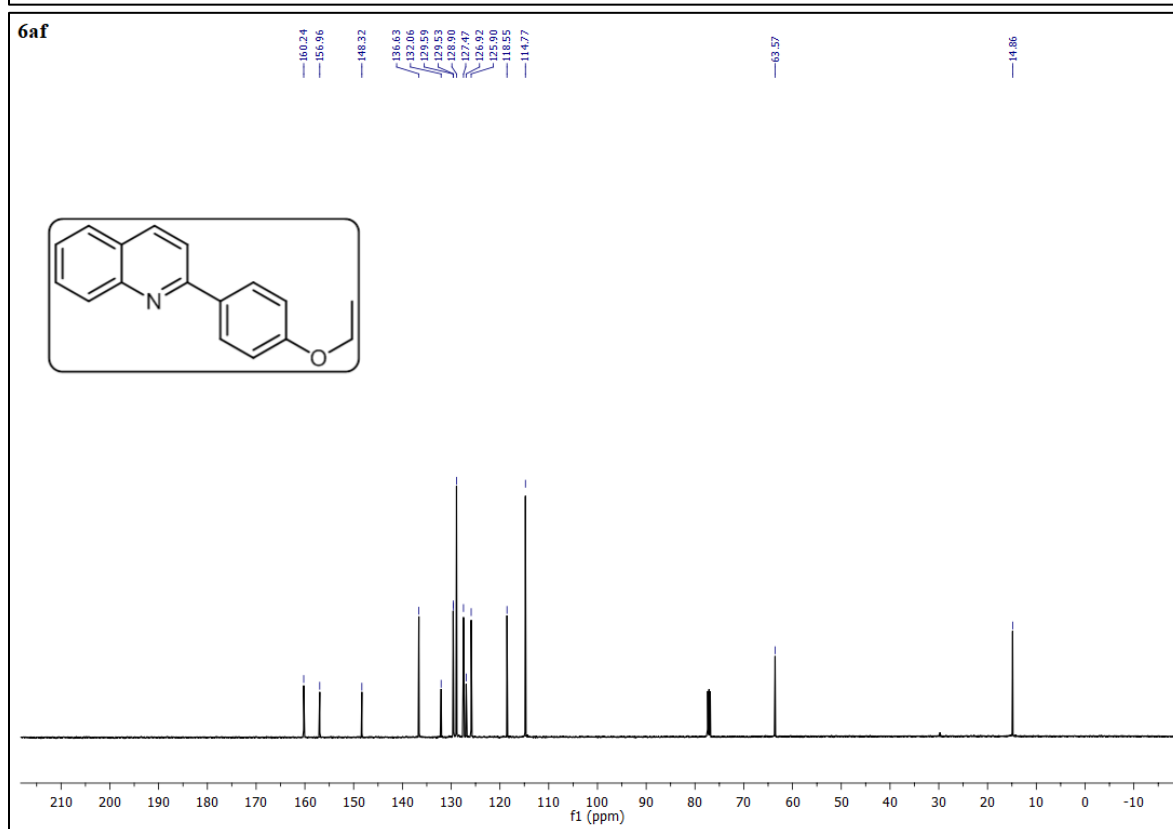

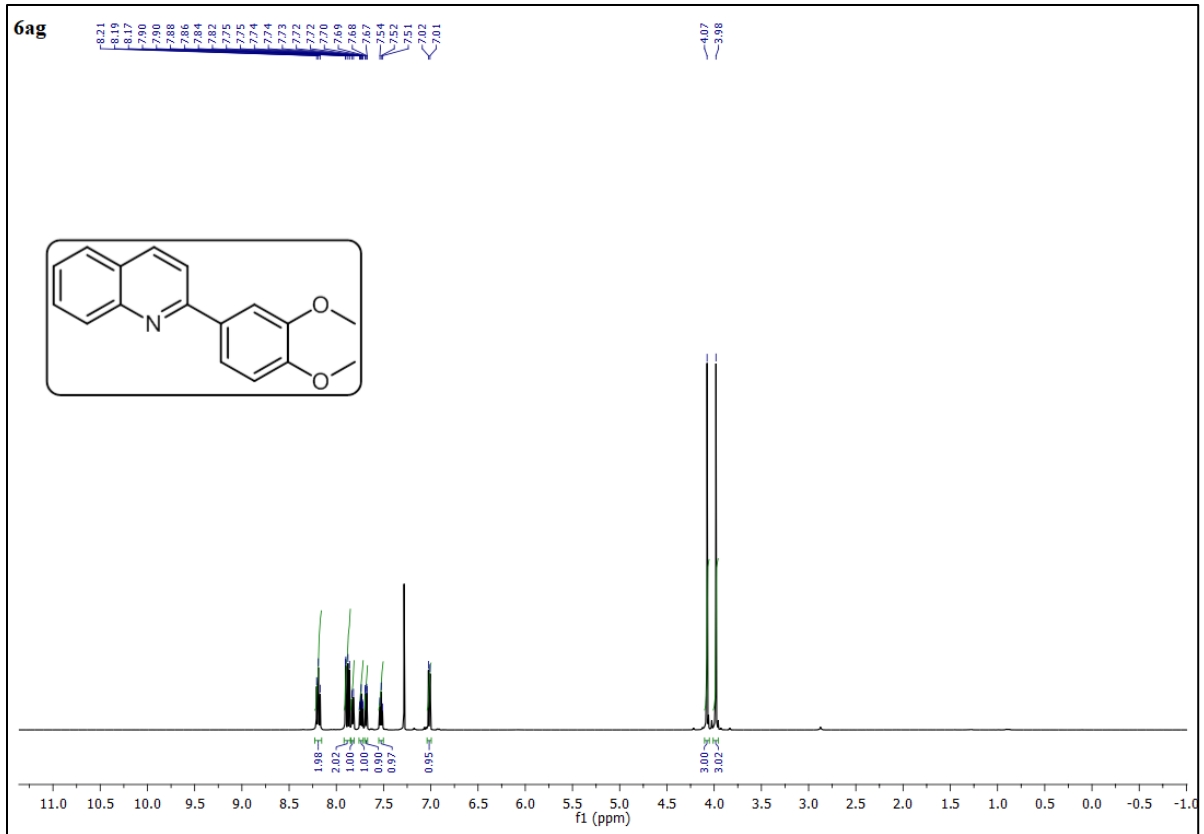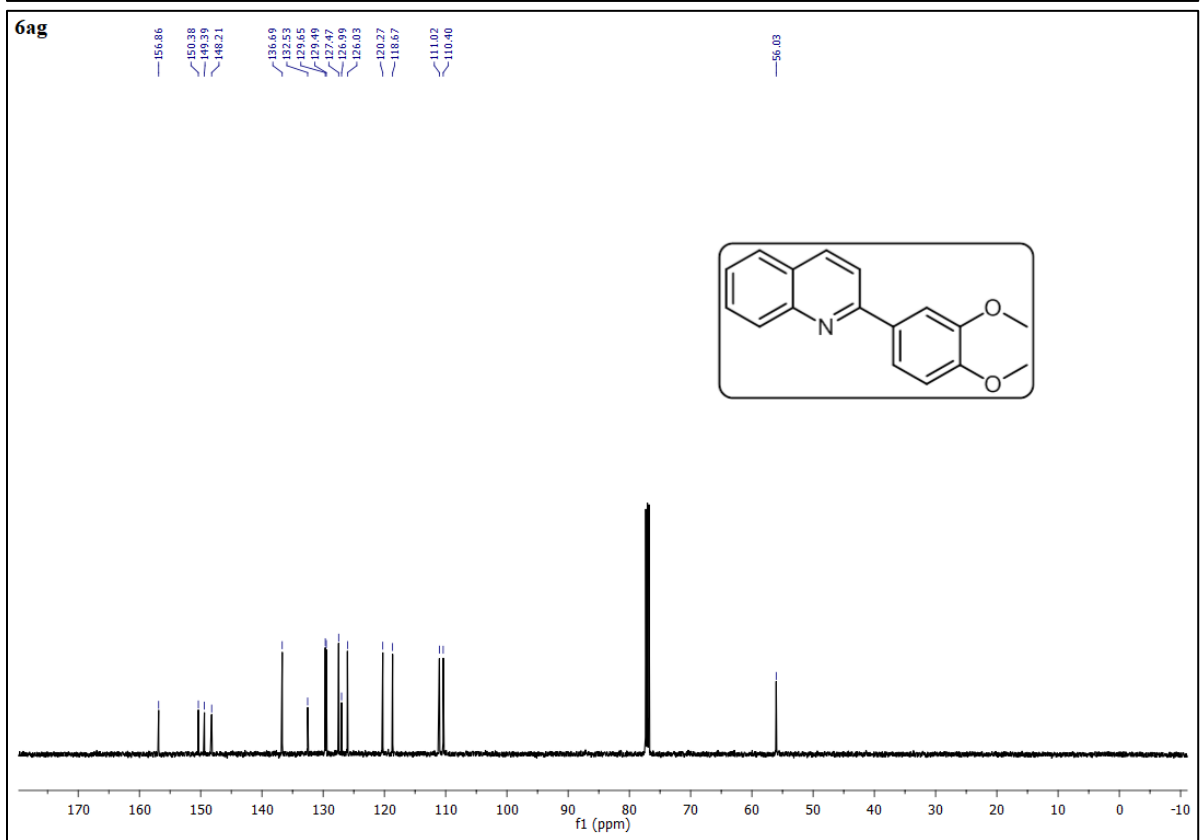

6ah

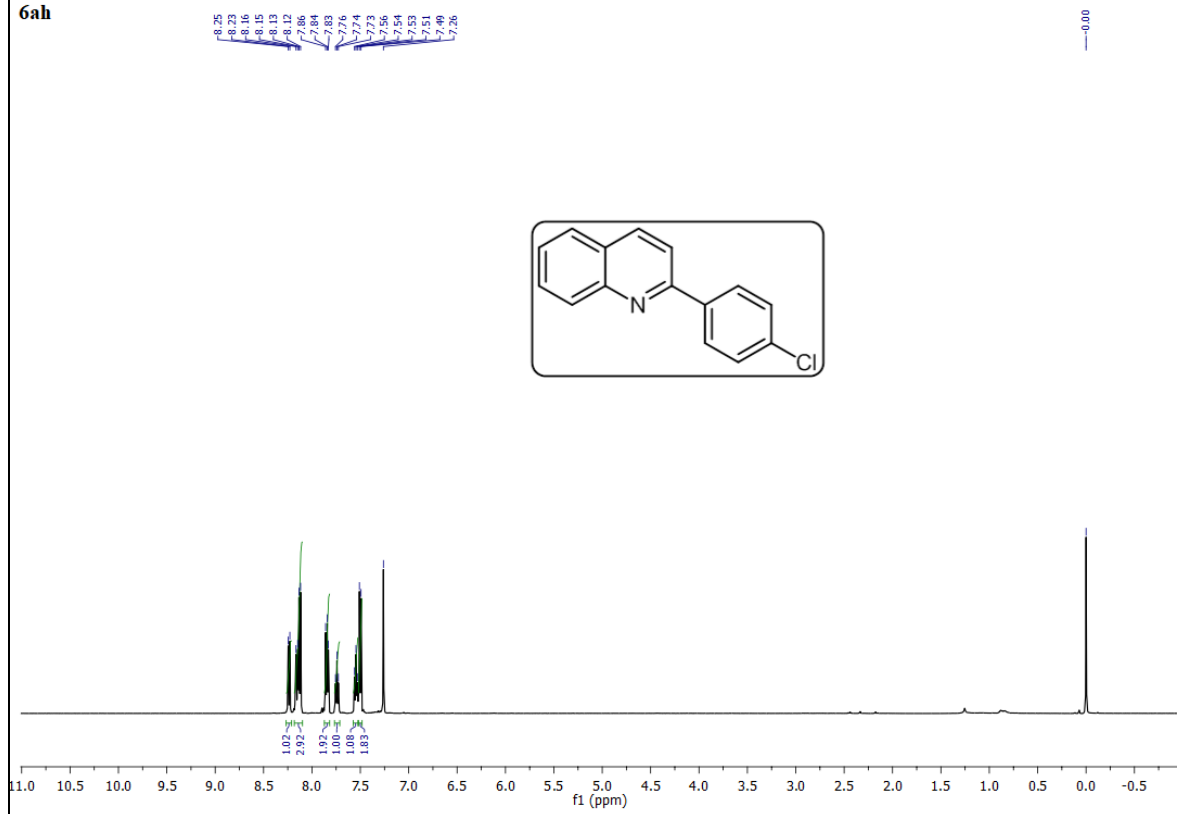

6ah

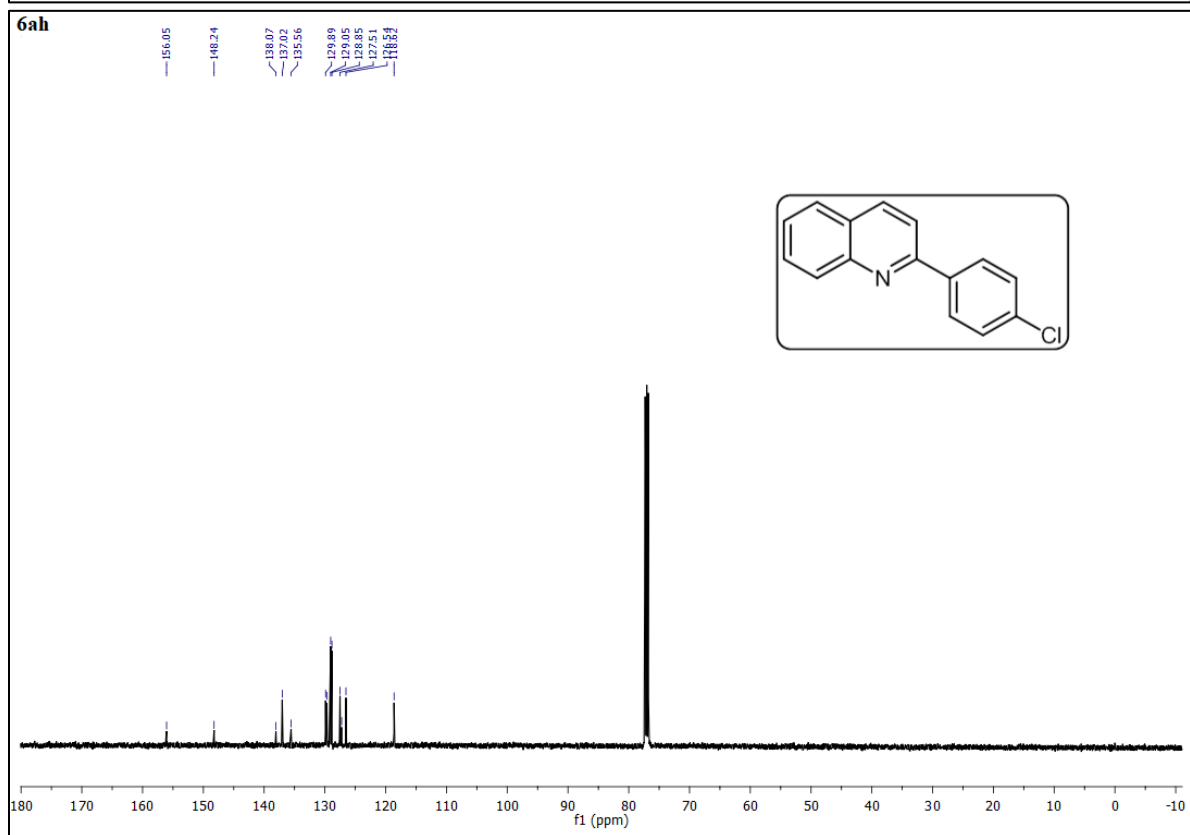



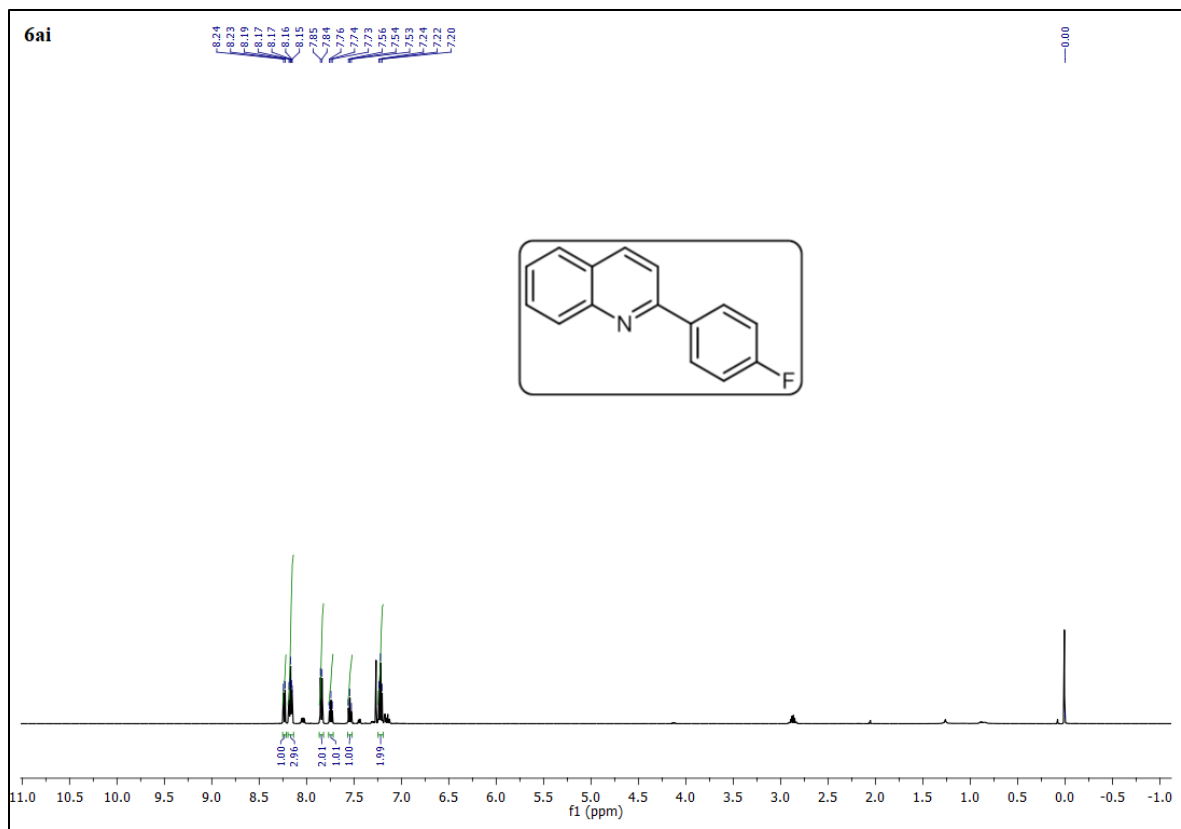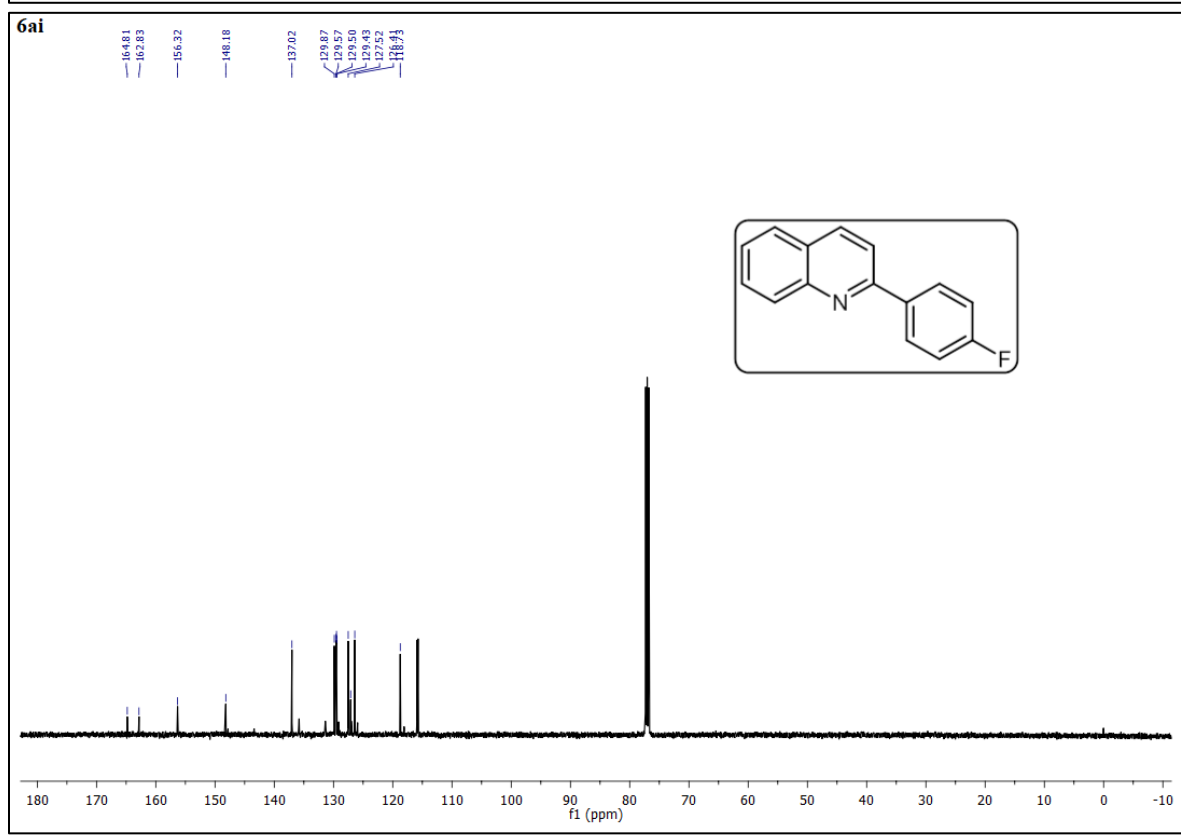

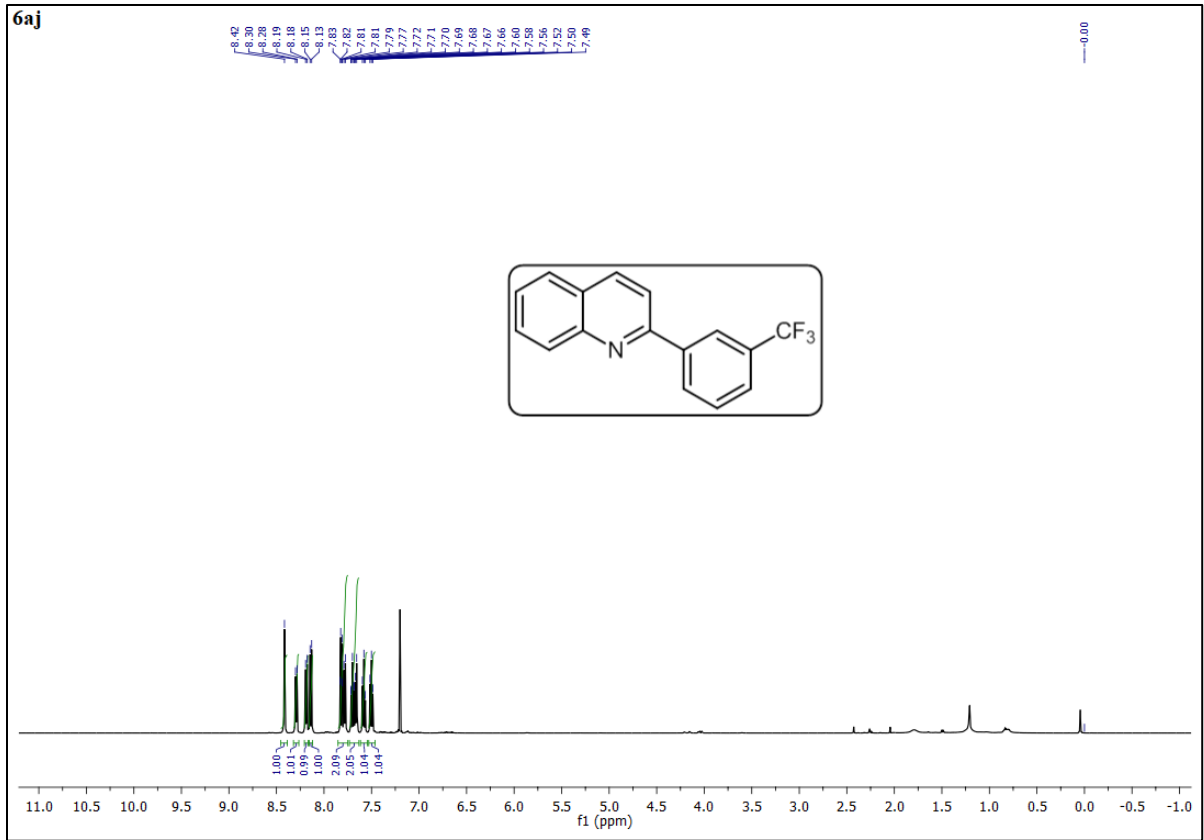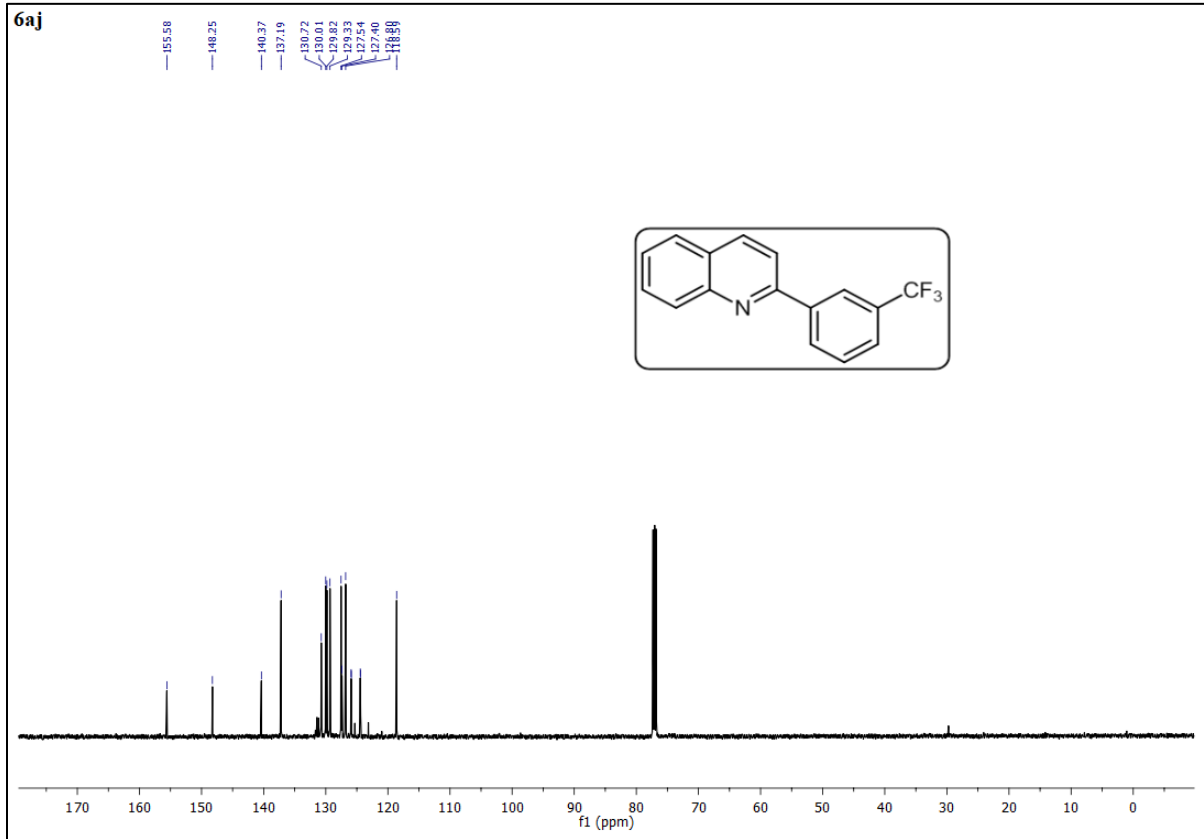

Supplement: d3nj00460k1.pdf [file d3nj00460k1.pdf]
